# Supplementary material
Source: ML conference proceedings conference paper supplement (https://openreview.net/forum?id=p8ujRTjEf3)
Supplement: supplementary_material [file attachment]

# ONLY PAY FOR WHAT IS UNCERTAIN: VARIANCE-ADAPTIVE THOMPSON SAMPLING

Aadirupa Saha<sup>1\*</sup>, Branislav Kveton<sup>2</sup>

<sup>1</sup>Apple, <sup>2</sup>Amazon

## ABSTRACT

Most bandit algorithms assume that the reward variances or their upper bounds are known, and that they are the same for all arms. This naturally leads to suboptimal performance and higher regret due to variance overestimation. On the other hand, underestimated reward variances may lead to linear regret due to committing early to a suboptimal arm. This motivated prior works on variance-adaptive frequentist algorithms, which have strong instance-dependent regret bounds but cannot incorporate prior knowledge on reward variances. We lay foundations for the Bayesian setting, which incorporates prior knowledge. This results in lower regret in practice, since the prior is used in the algorithm design, and also improved regret guarantees. Specifically, we study Gaussian bandits with *unknown heterogeneous reward variances* and develop a Thompson sampling algorithm with prior-dependent Bayes regret bounds. We achieve lower regret with lower reward variances and more informative priors on them, which is precisely why we pay only for what is uncertain. This is the first such result in the bandit literature. Finally, we corroborate our theory with experiments, which demonstrate the benefit of our variance-adaptive Bayesian algorithm over prior frequentist works. We also show that our approach is robust to model misspecification and can be applied with estimated priors.

## 1 INTRODUCTION

A *stochastic bandit* (Lai & Robbins, 1985; Auer et al., 2002; Lattimore & Szepesvári, 2020) is an online learning problem where a *learning agent* sequentially interacts with an environment over  $n$  rounds. In each round, the agent pulls an *arm* and receives a *stochastic reward*. The mean rewards of the arms are initially unknown and the agent learns them by pulling the arms. Therefore, the agent faces an *exploration-exploitation dilemma*: *explore*, and learn more about the arms by pulling them; or *exploit*, and commit to the arm with the highest estimated reward. An example of this setting is a recommender system, where the arm is a recommendation and the reward is a click.

Most bandit algorithms assume that the reward variance or its upper bound is known. For instance, the confidence intervals in UCB1 (Auer et al., 2002) are derived under the assumption that the rewards are  $[0, 1]$ , and hence  $\sigma^2$ -sub-Gaussian for  $\sigma = 0.5$ . In Bernoulli KL-UCB (Garivier & Cappé, 2011) and Thompson sampling (TS) (Agrawal & Goyal, 2012), tighter confidence intervals are derived for Bernoulli rewards. Specifically, a Bernoulli random variable with either a low or high mean also has a low variance. In general, the reward variance may be hard to specify (Audibert et al., 2009b). *While overestimating it is typically safe, this decreases the learning rate of the bandit algorithm and thus increases its regret. On the other hand, when the variance is underestimated, this may lead to linear regret because the algorithm can commit to an arm without sufficient evidence.*

We motivate learning of reward variances by the following example. Take a movie recommender that learns to recommend highest rated movies in a “Trending Now” carousel. The movies are rated on scale  $[1, 5]$ . Some movies, such as The Godfather, are classics. Therefore, their ratings are high on average and have low variance. On the other hand, ratings of low-budget movies are often low on average and have low variance, due to the quality of the presentation. Finally, most movies are made for a specific audience, such as Star Wars, and thus have a high variance in ratings. Clearly, any

\*Corresponding email: aadirupa.saha@gmail.com

sensible learning algorithm would require fewer queries to estimate the mean ratings of movies with low variances. Since the variance is unknown a priori, adaptation is necessary. This would reduce the overall query complexity and improve statistical efficiency—as one should—because we only pay for what is uncertain. This example is not limited to movies and applies to other domains, such as online shopping. Our work answers the following questions in affirmative:

*Can we quickly learn the right representation of the reward distribution for efficient learning? What is the right dependence of the learner’s performance (regret) versus the prior parameters and reward variances? Can we design an algorithm to achieve that rate? Does the regret decrease with lower reward variances and more informative priors on them?*

Unknown reward variances are a major concern and thus have been studied extensively. In the cumulative regret setting, Audibert et al. (2009b) proposed an algorithm based on upper confidence bounds (UCBs) and Mukherjee et al. (2018) proposed an elimination algorithm. In best-arm identification (BAI) (Audibert et al., 2009b; Bubeck et al., 2009), several papers studied the fixed-budget (Gabillon et al., 2011; Faella et al., 2020; Saha et al., 2020; Lalitha et al., 2023) and fixed-confidence (Lu et al., 2021; Zhou & Tian, 2022; Jourdan et al., 2022) settings with unknown reward variances. All above works studied frequentist algorithms. On the other hand, Bayesian algorithms based on posterior sampling (Thompson, 1933; Chapelle & Li, 2011; Agrawal & Goyal, 2012; Russo & Van Roy, 2014; Russo et al., 2018; Kveton et al., 2021; Hong et al., 2022b) perform well in practice, but learning of reward variances in these algorithms is understudied.

We consider the Bayesian setting (Russo & Van Roy, 2014) and introduce it in detail in Section 3. This is because Bayesian algorithms are very practical (Chapelle & Li, 2011; Russo et al., 2018; Kveton et al., 2021) and Bayesian analyses are the only bandit analyses that can capture the dependence on prior (Russo & Van Roy, 2016; Lu & Van Roy, 2019; Hong et al., 2022b;a). More specifically, as the prior becomes more informative, Bayes regret bounds go to zero, and so does the Bayes regret of Thompson sampling. Frequentist regret bounds do not have this behavior because they are proved for any bandit instance, which is unrelated to the prior in the bandit algorithm (Agrawal & Goyal, 2012; 2013b). In fact, all frequentist regret bounds for Bayesian algorithms assume a sufficiently-wide prior, which is analogous to being uninformative. Taking an expectation of frequentist regret bounds over instances sampled from the prior does not yield the right dependence on the prior. In our experiments, we show that as the prior becomes more informative, our bounds become tighter than the frequentist bounds. This shows the benefit of Bayesian analyses.

Bayesian analyses have two shortcomings. First, they are on average over bandit instances sampled from the prior. This relates the bandit instances to the prior in the bandit algorithm and allows a prior-dependent analysis. Second, to derive closed-form posteriors and use them in the analysis, modeling assumptions are needed. In our work, we assume Gaussian noise, which is less general than the sub-Gaussian noise that is typically used in frequentist analyses (Abbasi-Yadkori et al., 2011). Our contributions are summarized next.

**Contributions:** (1) To warm up, we start with Thompson sampling in a  $K$ -armed Gaussian bandit with *known heterogeneous reward variances* (Section 4). Its regret bound (Theorem 1) decreases as reward variances decrease. It also approaches zero as the prior variances of mean arm rewards go to zero, since a Bayesian learning agent knows the bandit instance with certainty in this case. (2) We propose a Thompson sampling algorithm VarTS for a  $K$ -armed Gaussian bandit with *unknown heterogeneous reward variances* (Section 5). VarTS maintains a joint Gaussian-Gamma posterior for the mean and precision of the rewards of all arms and samples from it in each round. (3) We prove a Bayes regret bound for VarTS (Theorem 2), which decreases with lower reward variances and more informative priors on them. This is the first such regret bound. The novelty in our analysis is in handling random confidence interval widths due to random reward variances. The bound captures the same trade-offs as if the variance was known, replaced by the corresponding prior-dependent quantities. (4) We evaluate VarTS on various types of reward distributions, from Bernoulli to beta to Gaussian (Section 6). Our evaluation shows that VarTS outperforms all existing baselines, even with an estimated prior. This showcases the generality and robustness of our method.

## 2 RELATED WORK

Classic  $K$ -armed bandits have been studied for over three decades (Lai & Robbins, 1985; Lai, 1987). Two popular techniques for solving these problems are UCBs (Auer, 2002; Audibert et al., 2009a;

Ménard & Garivier, 2017) and Thompson sampling (Thompson, 1933; Agrawal & Goyal, 2012; Bubeck & Liu, 2013). Recent works on TS matched the minimax optimal rate in  $K$ -armed bandits (Jin et al., 2021). Jin et al. (2023) designed a minimax and asymptotically optimal TS. Improved TS algorithms for combinatorial bandits and semi-bandits have also been proposed (Perrault et al., 2020; Perrault, 2022). The focus of our work is on TS that adapts to unknown reward variances.

The beginnings of variance-adaptive algorithms can be traced to Auer et al. (2002). Auer et al. (2002) proposed a variance-adaptive UCB1 for Gaussian bandits, called UCB1-Normal, where the reward distribution of arm  $i$  is  $\mathcal{N}(\mu_i, \sigma_i^2)$  and  $\sigma_i > 0$  is known by the learning agent. The  $n$ -round regret of this algorithm is  $O\left(\sum_{i:\mu_i < \mu_{a^*}} \frac{\sigma_i^2}{\Delta_i} \log n\right)$ , where  $\Delta_i = \mu_{a^*} - \mu_i$  is the gap of arm  $i$  and  $a^*$  is the arm with the highest mean reward  $\mu_{a^*}$ . The first UCB algorithm for unknown reward variances with an analysis was UCB-V by Audibert et al. (2009b). The key idea in the algorithm is to design high-probability confidence intervals based on empirical Bernstein bounds. The  $n$ -round regret of UCB-V is  $O\left(\sum_{i:\mu_i < \mu_{a^*}} \left(\frac{\sigma_i^2}{\Delta_i} + b\right) \log n\right)$ , where  $b$  is an upper bound on the absolute value of rewards. In summary, variance adaptation in UCB-V incurs only a small penalty of  $O(bK \log n)$ . Mukherjee et al. (2018) proposed an elimination-based variant of UCB-V that attains the optimal gap-free regret of  $O(\sqrt{Kn})$ . While empirical Bernstein bounds are general, they tend to be conservative in practice. This was observed by Garivier & Cappe (2011) and we observe the same trend in our experiments (Section 6). Our work can be viewed as a similar development to UCB-V in Thompson sampling. We show that Thompson sampling with unknown reward variances (Section 5) incurs only a slightly higher regret than the one with known variances (Section 4), by a multiplicative factor. Compared to UCB-V, the algorithm is highly practical.

Two closest papers to our work are Honda & Takemura (2014); Zhu & Tan (2020). Both papers propose variance-adaptive Thompson sampling and bound its regret. There are three key differences from our work. First, the algorithms of Honda & Takemura (2014); Zhu & Tan (2020) are designed for the frequentist setting. Specifically, they have a fixed sufficiently-wide prior and enjoy a per-instance regret bound under this prior. While this is a strong guarantee, the algorithms can perform poorly when priors are narrower and thus more informative. Truly Bayesian algorithm designs, as proposed in our work, can be analyzed for any informative prior. Second, the analyses of Honda & Takemura (2014); Zhu & Tan (2020) are frequentist. Therefore, they cannot justify the use of more informative priors. We prove regret bounds that decrease with lower reward variances and more informative priors on them. Finally, the regret bounds of Honda & Takemura (2014); Zhu & Tan (2020) are asymptotic. We provide strong finite-time guarantees. We discuss these difference in more detail after Theorem 2 and demonstrate them empirically in Section 6.

Another line of related works are variance-dependent regret bounds for  $d$ -dimensional linear contextual bandits (Kim et al., 2022; Zhao et al., 2022; 2023; Zhang et al., 2021). These works address the problem of time-dependent variance adaptivity. They derive frequentist regret bounds that scale as  $\tilde{O}(\text{poly}(d)\sqrt{1 + \sum_{t=1}^n \sigma_t^2})$ , where  $\sigma_t^2$  is an unknown reward variance in round  $t$ . This setting is different from ours in two aspects. First, the reward variances change over time but are fixed across the arms. We do the opposite in our work. Second, their algorithm designs and analyses are frequentist, and thus do not exploit prior knowledge. On the other hand, we focus only on  $K$ -armed bandits, which is a special case of linear bandits.

### 3 PROBLEM SETUP

**Notation.** The set  $\{1, \dots, n\}$  is denoted by  $[n]$ . The indicator  $\mathbb{1}\{E\}$  denotes that event  $E$  occurs. We use boldface letters to denote vectors. For any vector  $\mathbf{v} \in \mathbb{R}^d$ , we denote its  $i$ -th entry by  $v_i$  or  $v(i)$ . We denote the entry-wise square of  $\mathbf{v}$  by  $\mathbf{v}^2$ . A diagonal matrix with entries  $\mathbf{v}$  is  $\text{diag}(\mathbf{v})$ .  $\tilde{O}$  is the big O notation up to polylogarithmic factors. Gaussian, Gamma, and Gaussian-Gamma distributions are denoted by  $\mathcal{N}$ ,  $\text{Gam}$ , and  $NG$ , respectively. For any random variables  $X$  and  $Y$ , we abbreviate  $\mathbb{E}[\mathbb{E}[\cdot | X, Y] | X]$  as  $\mathbb{E}[\mathbb{E}[\cdot | Y] | X]$ .

**Setting.** A bandit *instance* is a pair of mean arm rewards and reward variances,  $(\boldsymbol{\mu}, \boldsymbol{\sigma}^2)$ , where  $\boldsymbol{\mu} \in \mathbb{R}^K$  is a vector of mean arm rewards,  $\boldsymbol{\sigma}^2 \in \mathbb{R}_{\geq 0}^K$  is a vector of reward variances, and  $K$  is the number of arms. We propose algorithms and analyze them for both when the reward variances  $\boldsymbol{\sigma}^2$  are known (Section 4) and unknown (Section 5).

**Feedback model.** The agent interacts with the bandit instance  $(\mu, \sigma^2)$  for  $n$  rounds. In round  $t \in [n]$ , it pulls an arm and observes its stochastic reward. We denote the pulled arm in round  $t$  by  $A_t \in [K]$ , a stochastic reward vector of all arms in round  $t$  by  $x_t \in \mathbb{R}^K$ , and the reward of arm  $i \in [K]$  by  $x_{t,i} \in \mathbb{R}$ . The rewards are sampled from a Gaussian distribution,  $x_{t,i} \sim \mathcal{N}(\mu_i, \sigma_i^2)$ . The interactions of the agent up to round  $t$  are summarized by a *history*  $H_t = (A_1, x_{1,A_1}, \dots, A_{t-1}, x_{t-1,A_{t-1}})$ .

**Bayesian bandit setting.** We consider a *Bayesian multi-armed bandit* (Russo & Van Roy, 2014; Russo et al., 2018; Kveton et al., 2021; Hong et al., 2022b) where the bandit instance is either fully or partially random:

(i). When *reward variances are known* (Section 4), the bandit instance  $(\mu, \sigma)$  is generated as follows. The mean arm rewards are sampled from a Gaussian distribution,  $\mu \sim P_0 = \mathcal{N}(\mu_0, \text{diag}(\sigma_0^2))$ , where  $\mu_0 \in \mathbb{R}^K$  and  $\sigma_0^2 \in \mathbb{R}_{\geq 0}^K$  are the prior means and variances of  $\mu$ , respectively. Both  $\mu_0$  and  $\sigma_0^2$  are assumed to be known by the agent. The reward variances  $\sigma^2$  are also known.

(ii). When *reward variances are unknown* (Section 5), the bandit instance  $(\mu, \sigma)$  is sampled from a Gaussian-Gamma prior. Specifically, for any arm  $i$ , the mean and variance of its rewards are sampled as  $(\mu_i, \sigma_i^{-2}) \sim NG(\mu_{0,i}, \kappa_{0,i}, \alpha_{0,i}, \beta_{0,i})$ , where  $(\mu_0, \kappa_0, \alpha_0, \beta_0)$  are known prior parameters. This can also be seen as sampling  $\sigma_i^{-2} \sim \text{Gam}(\alpha_{0,i}, \beta_{0,i})$  and then  $\mu_i \sim \mathcal{N}(\mu_{0,i}, \frac{\sigma_i^2}{\kappa_{0,i}})$ . This equivalence follows from the basic properties of the Gaussian-Gamma distribution (Lemma 3 in Appendix).

**Regret.** We measure the  $n$ -round *Bayes regret* of a learning agent with instance prior  $P_0$  as:

$$R_n = \mathbb{E} \left[ \sum_{t=1}^n \mu_{A^*} - \mu_{A_t} \right], \quad (1)$$

where  $A^* = \arg\max_{i \in [K]} \mu_i$  is the *optimal arm*. The above expectation is over mean arm rewards  $\mu$  drawn from the prior distribution, unlike in the frequentist setting where  $\mu$  would be unknown but fixed (Lattimore & Szepesvári, 2020). The randomness in the expectation includes how the agent chooses  $A_t$  and the randomness in bandit feedback  $x_{t,A_t} \sim \mathcal{N}(\mu_{A_t}, \sigma_{A_t}^2)$ .

We depart from the classic bandit setting (Auer et al., 2002; Abbasi-Yadkori et al., 2011; Lattimore & Szepesvári, 2020) in two major ways. First, we consider Gaussian reward noise, as opposing to a more general sub-Gaussian noise. The Gaussian noise and corresponding conjugate priors lead to closed-form posteriors in our algorithms and analyses, which simplifies them. This is why this choice has been popular in recent Bayesian analyses (Lu & Van Roy, 2019; Kveton et al., 2021; Wan et al., 2021; Hong et al., 2022b;a). Second, our regret is Bayesian, on average over bandit instances. An alternative would be the frequentist regret, which holds for any bounded bandit instance. We choose the Bayes regret because it can capture the relation between the bandit instance and its prior, and thus show benefits of informative priors. We discuss this in depth throughout the paper, and especially after Theorem 1 and Theorem 2. To alleviate concerns about Gaussian posteriors in the algorithm design, we experiment with non-Gaussian bandit problems in Section 6.

## 4 GAUSSIAN BANDIT WITH KNOWN VARIANCES

We start with the Bayesian setting with Gaussian rewards and known heterogeneous reward variances. In Section 4.1, we introduce a Thompson sampling algorithm (Thompson, 1933; Chapelle & Li, 2011; Agrawal & Goyal, 2012) for this setting. Gaussian TS is straightforward and appeared in many prior works, starting with Agrawal & Goyal (2013a). We state and discuss its regret bound in Section 4.2. The bound scales roughly as:

$$\sqrt{n \log n} \sqrt{\sum_{i=1}^K \sigma_i^2 \log \left( 1 + n \frac{\sigma_{0,i}^2}{\sigma_i^2} \right)}. \quad (2)$$

One notable property of the bound is that it goes to zero when the reward variances  $\sigma_i^2$  or the prior variances of the mean arm rewards  $\sigma_{0,i}^2$  do. Although the bound is novel, its proof mostly follows Kveton et al. (2021). We mainly state it to contrast it with the main result in Section 5.

### 4.1 GAUSSIAN THOMPSON SAMPLING

The key idea in our algorithm is to maintain a posterior distribution over the unknown mean arm rewards  $\mu$  and act optimistically with respect to samples from it. Since  $\mu$  and its rewards are sampled

from Gaussian distributions, the posterior is also Gaussian. Specifically, the posterior distribution of arm  $i$  in round  $t$  is  $\mathcal{N}(\hat{\mu}_{t,i}, \sigma_{t,i}^2)$ , where  $\hat{\mu}_{t,i}$  and  $\sigma_{t,i}^2$  are the posterior mean and variance, respectively, of arm  $i$  in round  $t$ . These quantities are initialized as  $\hat{\mu}_{1,i} := \mu_{0,i}$  and  $\sigma_{1,i} := \sigma_{0,i}$ .

Our algorithm is presented in Algorithm 1 (Appendix A) and we call it *Gaussian TS* due to Gaussian rewards. The algorithm works as follows. In round  $t$ , it samples the mean reward of each arm  $i$  from its posterior,  $\tilde{\mu}_{t,i} \sim \mathcal{N}(\hat{\mu}_{t,i}, \sigma_{t,i}^2)$ . After that, the arm with the highest posterior-sampled mean reward is pulled,  $A_t := \arg \max_{i \in [K]} \tilde{\mu}_{t,i}$ . Finally, the algorithm observes a stochastic reward of arm  $A_t$ ,  $x_{t,A_t} \sim \mathcal{N}(\mu_{A_t}, \sigma_{A_t}^2)$ , and updates its posteriors (Lemma 7 in Appendix) as:

$$\sigma_{t+1,i}^2 := \frac{1}{\sigma_{0,i}^{-2} + N_{t+1}(i)\sigma_i^{-2}}, \quad \hat{\mu}_{t+1,i} := \sigma_{t+1,i}^2 \left( \frac{\mu_{0,i}}{\sigma_{0,i}^2} + \frac{N_{t+1}(i)\bar{x}_{t+1,i}}{\sigma_i^2} \right),$$

where  $\bar{x}_{t+1,i} := \frac{1}{N_{t+1}(i)} \sum_{s=1}^t \mathbb{1}\{A_s = i\} x_{s,i}$  is the empirical mean reward of arm  $i$  at the beginning of round  $t+1$  and  $N_{t+1}(i)$  is the number of its pulls. The complete pseudocode of Algorithm 1 is given in Appendix A.

## 4.2 REGRET ANALYSIS

Before analyzing Algorithm 1, we recall the setting again. The mean arm rewards are sampled from a Gaussian prior,  $\boldsymbol{\mu} \sim P_0 = \mathcal{N}(\boldsymbol{\mu}_0, \text{diag}(\boldsymbol{\sigma}_0^2))$ , where  $\boldsymbol{\mu}_0 \in \mathbb{R}^K$  and  $\boldsymbol{\sigma}_0^2 \in \mathbb{R}_{\geq 0}^K$  are the prior means and variances of  $\boldsymbol{\mu}$ , respectively. The reward of arm  $i$  in round  $t$  is sampled as  $x_{t,i} \sim \mathcal{N}(\mu_i, \sigma_i^2)$ . Both  $\boldsymbol{\mu}_0$  and  $\boldsymbol{\sigma}_0^2$ , and reward variances  $\boldsymbol{\sigma}^2$ , are fixed and known. Our regret bound is stated below.

**Theorem 1** (Variance-dependent regret bound for known variances). *Consider the above setting. Then for any  $\delta > 0$ , the Bayes regret of Gaussian TS is bounded as:*

$$R_n \leq \sum_{i=1}^K \sqrt{\frac{2\sigma_{0,i}^2}{\pi} n\delta} + \sqrt{2n} \sqrt{\sum_{i=1}^K \sigma_i^2 \left( \log(1 + n\sigma_{0,i}^2\sigma_i^{-2}) + \sigma_{0,i}^2\sigma_i^{-2} \right) \log(1/\delta)}.$$

The complete proof of Theorem 1 is in Appendix B. We discuss the bound below.

**Dependence on all parameters of interest and prior.** For  $\delta = 1/n$ , the bound in Theorem 1 scales roughly as  $\tilde{O} \left( \sqrt{n \sum_{i=1}^K \sigma_i^2 \log(1 + n\sigma_{0,i}^2\sigma_i^{-2})} + \sqrt{n \sum_{i=1}^K \sigma_{0,i}^2\sigma_i^{-2}} \right)$ . Note that we ignore the first term in Theorem 1, which is order-wise dominated by the second term when  $\delta = 1/n$ . Our bound has several properties that we discuss next. First, it matches the usual  $\sqrt{n}$  dependence of all classic Bayes regret bounds (Russo & Van Roy, 2014; 2016; Lu & Van Roy, 2019). Second, it increases with variances  $\sigma_i^2$  of individual arm rewards, which is expected because higher reward variances make learning harder. Third, the bound can be viewed as a generalization of existing bounds that assume homogeneous reward variances. Specifically, Kveton et al. (2021) proved a  $\tilde{O}(\sqrt{\sigma^2 K n})$  Bayes regret bound in Lemma 4 under the assumption that the reward distribution of arm  $i$  is  $\mathcal{N}(\mu_i, \sigma^2)$ . We match it when  $\sigma_i = \sigma$  for all arms  $i$ . Fourth, the bound approaches zero as  $\sigma_{0,i} \rightarrow 0$ . In this setting, Gaussian TS knows the mean arm rewards  $\mu_i$  almost with certainty because their prior variances  $\sigma_{0,i}^2$  are low, and thus no exploration is necessary. This is a unique property of Bayes regret bounds that is not captured by any frequentist analysis, such as that of UCB1-Normal (Auer et al., 2002).

**Regret optimality.** Starting with the seminal works of Russo & Van Roy (2014; 2016), most Bayes regret bounds are  $\tilde{O}(\sqrt{n})$  and do not have finite-time instance-dependent lower bounds. Lattimore & Szepesvári (2020) derived a  $\Omega(\sqrt{K n})$  asymptotic lower bound for a  $K$ -armed bandit as  $n \rightarrow \infty$  (Theorem 35.1). Our regret bound (Theorem 1) matches this rate when all variances are the same,  $\sigma_{0,i} = \sigma_i = 1$  for all  $i \in [K]$ . In addition, it provides an improved dependence on lower reward variances and more informative priors, which implies faster learning rates in these regimes. In fact, when the prior variances of all mean arm rewards go to zero,  $\sigma_{0,i} \rightarrow 0$  for all  $i \in [K]$ , our bound goes to zero; as expected. Therefore, we conjecture that our regret bound is worst-case optimal. The only other lower bound that we are aware of is  $\Omega(\log^2 n)$  for a  $K$ -armed bandit (Theorem 3 in Lai (1987)). This lower bound is asymptotic and applies only to exponential-family reward distributions with a single parameter, which excludes Gaussian distributions because they have two parameters. The

lower bound was recently matched in a Bernoulli bandit by Atsidakou et al. (2023). This indicates that logarithmic upper bounds may be possible in our setting. To conclude, we believe that deriving a tight finite-time  $\Omega(\sqrt{Kn})$  lower bound for our setting or a logarithmic upper bound are important problems, and we leave them for future work.

## 5 GAUSSIAN BANDIT WITH UNKNOWN VARIANCES

Our main contribution is the Bayesian setting with Gaussian rewards and unknown heterogeneous reward variances. Similarly to Section 4, we propose a Thompson sampling algorithm for this setting in Section 5.1. We state and discuss its regret bound in Section 5.2. The bound scales roughly as:

$$\sqrt{n \log n} \sqrt{\sum_{i=1}^K \frac{\beta_{0,i}}{\alpha_{0,i}-1} \log \left( 1 + \frac{n}{\kappa_{0,i}} \right)},$$

where  $\frac{\beta_{0,i}}{\alpha_{0,i}-1}$  is a proxy for the reward variance  $\sigma_i^2$  in equation 2 and  $\kappa_{0,i}^{-1}$  plays the role of  $\sigma_{0,i}^2/\sigma_i^2$ . Since the dependencies are analogous, the bound captures the structure of the problem similarly to equation 2. *Our main novelty lies in handling the uncertainty of reward variances  $\sigma^2$ , which is unique among all existing TS proofs.*

### 5.1 ALGORITHM VarTS

As in Algorithm 1, we maintain a posterior distribution over the unknown mean arm rewards  $\mu$  and act optimistically with respect to samples from it. The challenge is that the reward variances  $\sigma^2$  are also unknown. To overcome it, we use the fact that the posterior of  $(\mu_i, \sigma_i^{-2})$  is a Gaussian-Gamma distribution when the prior is and the rewards are Gaussian. We represent the posterior hierarchically, in an equivalent form (Lemma 3 in Appendix), as follows. The posterior distribution of the mean reward of arm  $i$  in round  $t$  is  $\mathcal{N}(\hat{\mu}_{t,i}, \sigma_{t,i}^2)$ , where  $\hat{\mu}_{t,i}$  and  $\sigma_{t,i}^2$  are the posterior mean and sampled variance, respectively. The variance is  $\sigma_{t,i}^2 = \frac{1}{\kappa_{t,i} \lambda_{t,i}}$ , where  $\kappa_{t,i} = O(N_t(i))$  and  $\lambda_{t,i}$  is a posterior-sampled reward precision of arm  $i$  in round  $t$ . The posterior distribution of  $\lambda_{t,i}$  is  $\text{Gam}(\alpha_{t,i}, \beta_{t,i})$ , where  $\alpha_{t,i}$  and  $\beta_{t,i}$  denote its shape and rate parameters, respectively. All posterior parameters are initialized by their prior values  $(\mu_{0,i}, \kappa_{0,i}, \alpha_{0,i}, \beta_{0,i})$ .

Our algorithm is presented in Algorithm 2 and we call it VarTS, because it adapts to the unknown reward variances of arms. The algorithm works as follows. In round  $t$ , it first samples the precision of each arm from its posterior,  $\lambda_{t,i} \sim \text{Gam}(\alpha_{t,i}, \beta_{t,i})$ , and then it samples the mean arm reward from its posterior,  $\tilde{\mu}_{t,i} \sim \mathcal{N}(\hat{\mu}_{t,i}, \frac{1}{\kappa_{t,i} \lambda_{t,i}})$ . After that, the arm with the highest posterior-sampled mean reward is pulled,  $A_t := \arg \max_{i \in [K]} \tilde{\mu}_{t,i}$ . Finally, the algorithm observes a stochastic reward of arm  $A_t$ ,  $x_{t,A_t} \sim \mathcal{N}(\mu_{A_t}, \sigma_{A_t}^2)$ , and updates its posteriors (lines 7–13 in Algorithm 2). The complete pseudocode Algorithm 2 is given in Appendix C.

### 5.2 REGRET ANALYSIS

We recall that the bandit instance  $(\mu, \sigma)$  is sampled from a Gaussian-Gamma distribution: for any arm  $i$ , the mean and variance of its rewards are sampled as  $(\mu_i, \sigma_i^{-2}) \sim NG(\mu_{0,i}, \kappa_{0,i}, \alpha_{0,i}, \beta_{0,i})$ , where  $(\mu_0, \kappa_0, \alpha_0, \beta_0)$  are known prior parameters. This can also be seen as first sampling  $\sigma_i^{-2} \sim \text{Gam}(\alpha_{0,i}, \beta_{0,i})$  and then  $\mu_i \sim \mathcal{N}(\mu_{0,i}, \frac{\sigma_i^2}{\kappa_{0,i}})$ . Our regret bound is stated below.

**Theorem 2** (Variance-dependent regret bound for unknown variances). *Consider the above setting and let  $\alpha_{0,i} \geq 1$  for all arms  $i \in [K]$ . Then for any  $\delta > 0$ , the Bayes regret of VarTS is bounded as:*

$$R_n \leq C \sqrt{n \log(1/\delta)} + \delta C \sqrt{nk/(2\pi)},$$

where  $C^2 = \sum_{i=1}^K \frac{\beta_{0,i}}{\alpha_{0,i}-1} \left( \frac{2}{\kappa_{0,i}} + \frac{0.5}{\kappa_{0,i}(\alpha_{0,i}-1)} + 5 \log \left( 1 + \frac{n}{\kappa_{0,i}} \right) \right)$  is a prior-dependent constant.

**Proof of Theorem 2.** The difficulty lies in tightly bounding confidence intervals of random reward means with unknown reward variances, to obtain the right dependence on  $\frac{\beta_{0,i}}{\alpha_{0,i}-1}$  and  $\frac{1}{\kappa_{0,i}}$ . This is algebraically challenging due complicated posterior updates of Gaussian-Gamma distributions in

Algorithm 2. To overcome these difficulties, we carefully condition random variables on each other together with their appropriate histories, and then combine them using Jensen’s and Cauchy-Schwarz inequalities. The key lemmas along with the complete proof of Theorem 2 are in Appendix D.

**Dependence on all parameters of interest and prior.** For  $\delta = 1/n$ , the bound in Theorem 2 is  $\tilde{O}(\sqrt{Cn})$ . The dependence on  $\sqrt{n}$  is the same as in Theorem 1. A closer examination of  $C$  reveals many similarities with Theorem 1.

First, since  $\sigma_i^{-2} \sim \text{Gam}(\alpha_{0,i}, \beta_{0,i})$ , we know that  $\sigma_i^2$  is sampled from an Inverse-Gamma distribution with the same parameters. The mean of this distribution is  $\beta_{0,i}/(\alpha_{0,i} - 1)$ . Hence,  $\beta_{0,i}/(\alpha_{0,i} - 1)$  in Theorem 2 plays the role of  $\sigma_i^2$  in Theorem 1 and represents the *effective reward variance*.

Second,  $\kappa_{0,i}$  in the Gaussian-Gamma prior plays the role of  $\sigma_i^2/\sigma_{0,i}^2$  in the known variance setting (Murphy, 2007). Therefore, as  $\kappa_{0,i} \rightarrow \infty$ , the bound in Theorem 2 should go to zero, similarly to Theorem 1. This is indeed the case and a very unique property of Bayes regret bounds, which is not captured by Honda & Takemura (2014); Zhou & Tian (2022).

Finally, we take  $\alpha_{0,i}, \beta_{0,i} \rightarrow \infty$  while keeping  $\beta_{0,i}/(\alpha_{0,i} - 1)$  fixed. Since the mean and variance of the Inverse-Gamma distribution are  $\beta_{0,i}/(\alpha_{0,i} - 1)$  and  $\beta_{0,i}^2/((\alpha_{0,i} - 1)^2(\alpha_{0,i} - 2))$ , respectively, the mean of the variance prior is fixed while we narrow its width. In this case, we expect the bound in Theorem 2 to approach Theorem 1, which happens because  $0.5/(\kappa_{0,i}(\alpha_{0,i} - 1))$  vanishes. After that, the bounds are similar up a multiplicative factor of 5.

**Existing frequentist regret bounds for variance-adaptive Thomson sampling.** Honda & Takemura (2014); Zhu & Tan (2020) proposed variance-adaptive Thompson sampling and bounded its regret. These works differ from us in three aspects. First, the algorithms of Honda & Takemura (2014); Zhu & Tan (2020) are designed for the frequentist setting. Specifically, they have a fixed sufficiently-wide prior, and enjoy a per-instance regret bound under this prior. As an example, the algorithm of Zhu & Tan (2020) for  $\rho \rightarrow \infty$  (Remark 4) is essentially VarTS with  $\mu_{0,i} = 0$ ,  $\kappa_{0,i} = 0$ ,  $\alpha_{0,i} = 0.5$ , and  $\beta_{0,i} = 0.5$ . While per-instance regret bounds are strong, the algorithms of Honda & Takemura (2014); Zhu & Tan (2020) can perform poorly when priors are narrower and thus more informative. Truly Bayesian algorithm designs, as proposed in our work, can be analyzed for any informative prior. Second, the analyses of Honda & Takemura (2014); Zhu & Tan (2020) are frequentist. This means that they cannot justify the use of more informative priors and are essentially similar to those of frequentist upper confidence bound algorithms. As an example, in Remark 4 of Zhu & Tan (2020), the authors derive a  $O\left(\sum_{i:\mu_i < \mu_{a^*}} \frac{1}{\Delta_i} \log n\right)$  regret bound, where  $\Delta_i = \mu_{a^*} - \mu_i$  and  $a^*$  is the arm with the highest mean reward  $\mu_i$ . This bound clearly does not depend on prior parameters, which we incorporate in our bounds. Specifically, our bound in Theorem 2 decreases with lower reward variances and more informative priors on them. Finally, the regret bounds of Honda & Takemura (2014); Zhu & Tan (2020) are asymptotic. We provide strong finite-time guarantees.

## 6 EXPERIMENTS

We also study the empirical performance of our proposed algorithms. Since VarTS does not assume that the reward variances are known, and thus is more realistic than Algorithm 1, we focus on VarTS. We conduct four experiments. First, we evaluate VarTS in a Bernoulli bandit, which is a standard bandit benchmark. Second, we experiment with beta reward distributions. Their support is  $[0, 1]$ , as in Bernoulli distributions, but their variances are not fully determined by their means. Since VarTS is designed for Gaussian bandits, the first two experiments also evaluate the robustness of VarTS to model misspecification. Third, we experiment with a Gaussian bandit. Finally, we vary the number of arms and observe how the performance of VarTS scales with problem size.

### 6.1 EXPERIMENTAL SETUP

All problem instances in our experiments are Bayesian bandits. The mean arm rewards are drawn from a prior distribution. In Gaussian bandits, VarTS is run with the true  $(\mu_0, \kappa_0, \alpha_0, \beta_0)$ . In other problems, the hyper-parameters of VarTS are set using the method of moments (Pearson, 1936) and samples from the prior. In particular, for a given Bayesian bandit, let  $\bar{\mu}_i$  and  $v_i$  be the estimated mean and variance of the mean reward of arm  $i$  sampled from its prior, respectively. Moreover, let  $\bar{\lambda}_i$  and  $\nu_i$  be the estimated mean and variance of the precision of the reward distribution of arm  $i$  sampled

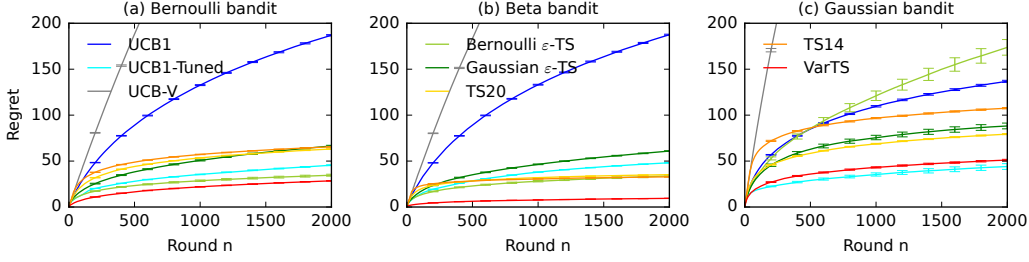

Figure 1: VarTS compared to 7 baselines. The plots share legends.

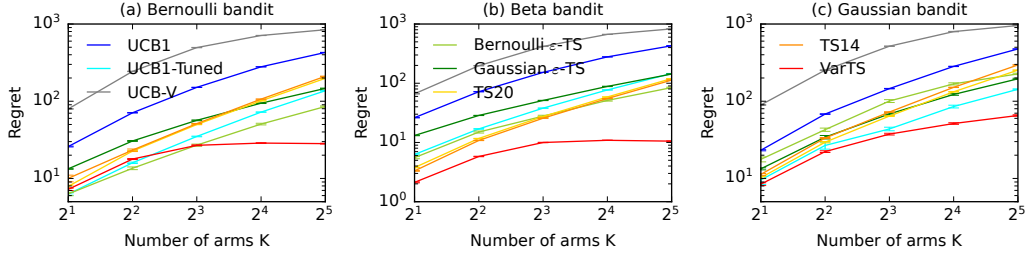Figure 2: VarTS with 7 baselines as we vary the number of arms  $K$ . The plots share legends.

from its prior, respectively. Then, using these statistics, we estimate the unknown hyper-parameters of the prior as  $\mu_{0,i} = \bar{\mu}_i$ ,  $\beta_{0,i} = \bar{\lambda}_i / \nu_i$ ,  $\alpha_{0,i} = \beta_{0,i} / \bar{\lambda}_i$ , and  $\kappa_{0,i} = \beta_{0,i} / (\alpha_{0,i} \nu_i)$ .

We compare VarTS to several baselines. UCB1 (Auer et al., 2002) is the most popular algorithm for stochastic  $K$ -armed bandits with  $[0, 1]$  rewards. It does not adapt to reward variances and thus may be too conservative in our setting. We also consider variance-adaptive UCB algorithms: UCB1-Tuned (Auer et al., 2002) and UCB-V (Audibert et al., 2009b). UCB1-Tuned is a heuristic that performs well in practice. UCB-V uses empirical Bernstein confidence intervals and has theoretical guarantees. We implement both algorithms for  $[0, 1]$  rewards. The next two baselines are Bernoulli and Gaussian TS (Agrawal & Goyal, 2013a). Bernoulli TS has a uniform Beta(1, 1) prior. When the rewards  $Y_{t,i}$  are not binary, we clip them to  $[0, 1]$  and then apply Bernoulli rounding: the reward is replaced with 1 with probability  $Y_{t,i}$  and 0 otherwise. Gaussian TS has a  $\mathcal{N}(0, 1)$  prior and unit reward variances. We modify both algorithms to explore using the posterior sample  $1/K$  fraction of time and the posterior mean otherwise, as proposed and analyzed in Jin et al. (2023). This significantly reduces the regret of Gaussian TS while the regret of Bernoulli TS remains comparable. We refer to these algorithms as  $\varepsilon$ -TS. The last two baselines are Thompson sampling with unknown reward variances (Honda & Takemura, 2014; Zhu & Tan, 2020). We implement Algorithm 1 in Honda & Takemura (2014) and call it TS14, and Algorithm 3 in Zhu & Tan (2020) for  $\rho \rightarrow \infty$  and call it TS20. Note that TS20 is VarTS where  $\mu_{0,i} = 0$ ,  $\kappa_{0,i} = 0$ ,  $\alpha_{0,i} = 0.5$ , and  $\beta_{0,i} = 0.5$ . The shortcoming of all TS baselines is that they are designed to have frequentist per-instance guarantees. Therefore, their priors are set too conservatively to compete with VarTS, which takes the true prior or its estimate as an input. In all simulations, the horizon is  $n = 2000$  and they are averaged over 1000 randomly initialized runs.

The baselines in our experiments were chosen to cover well existing variance-adaptive / not adaptive and Bayesian / frequentist bandit algorithms: UCB1-Tuned, UCB-V, TS14, and TS20 adapt to unknown reward variances; while UCB1 and  $\varepsilon$ -TS do not.  $\varepsilon$ -TS, TS14, and TS20 are Bayesian algorithms; while UCB1, UCB1-Tuned, and UCB-V are frequentist algorithms.

## 6.2 BERNOULLI BANDIT

We start with a Bernoulli bandit with  $K = 10$  arms. The mean reward of arm  $i \in [K]$ ,  $\mu_i$ , is sampled i.i.d. from prior Beta( $i, K + 1 - i$ ). Since  $\mathbb{E}[\mu_i] = i / (K + 1)$  and  $\text{std}[\mu_i] \approx 1 / \sqrt{K + 1}$ , higher prior means indicate higher  $\mu_i$ , although arm  $K$  may not have the highest mean reward.

Our results are reported in Figure 1a. We observe that VarTS and Bernoulli  $\varepsilon$ -TS have the lowest regret. The latter is not surprising since Bernoulli  $\varepsilon$ -TS is designed for this problem class. The fact



that we match its performance is a testament to adapting to reward variances and using priors. Three out of four of the next best-performing algorithms (UCB1-Tuned, TS14, and TS20) adapt to reward variances but do not use informative priors. The frequentist algorithms with regret bounds (UCB1 and UCB-V) have the highest regret because they are too conservative.

### 6.3 BETA BANDIT

The bandit problem in the second experiment is a variant of Section 6.2 where the reward distribution of arm  $i$  is  $\text{Beta}(s\mu_i, s(1 - \mu_i))$  for  $s = 10$ . Roughly speaking, this means that the reward variance of arm  $i$  is 10 lower than in Section 6.2. The rest of the setup is the same.

Our results are reported in Figure 1b. We observe only two differences from Figure 1a. First, VarTS outperforms Bernoulli  $\varepsilon$ -TS because it learns that the arms have 10 times lower reward variances than in Figure 1a. Therefore, it can be more aggressive in pulling the optimal arm. Second, both TS14 and TS20 outperform UCB1-Tuned, possibly due to more principled learning of reward variances.

### 6.4 GAUSSIAN BANDIT

The third experiment is with a Gaussian bandit where both the means and variances of rewards are sampled i.i.d. from a prior with parameters  $\mu_{0,i} = i/(K + 1)$ ,  $\kappa_{0,i} = K$ ,  $\alpha_{0,i} = 4$ , and  $\beta_{0,i} = 1$ . For this setting,  $\mathbb{E}[\mu_i] = i/(K + 1)$  and  $\text{std}[\mu_i] \approx 1/\sqrt{K + 1}$ . Therefore, higher prior means indicate higher  $\mu_i$ , although arm  $K$  may not have the highest mean reward. Since the average reward variance is 0.25, bandit algorithms for  $[0, 1]$  rewards are expected to work well.

Our results are reported in Figure 1c. We observe that UCB1-Tuned has the lowest regret and VarTS performs similarly. This shows the practicality of our design, which is analyzable and comparable to a well-known heuristic without guarantees. All other algorithms have at least 50% higher regret. As before, the frequentist algorithms with regret bounds (UCB1 and UCB-V) are overly conservative and among the worst performing baselines.

### 6.5 SCALABILITY

We vary the number of arms  $K$  and observe how the performance of VarTS scales with problem size. This experiment is done in Bernoulli (Section 6.2), beta (Section 6.3), and Gaussian (Section 6.4) bandits. Our results in Figure 2 show that the gap between VarTS and the baselines increases with  $K$ . For  $K = 32$  and Bernoulli bandit, VarTS has at least 3 times lower regret than any baseline. For  $K = 32$  and beta bandit, VarTS has at least 5 times lower regret than any baseline. For  $K = 32$  and Gaussian bandit, VarTS has at least 2 times lower regret than any baseline. These gains are driven by adaptation to reward variances and using priors, on both the mean and variance of the rewards.

## 7 CONCLUSIONS

We study the problem of learning to act in a multi-armed Bayesian bandit with Gaussian rewards and heterogeneous reward variances. As a first step, we present a Thompson sampling algorithm for the setting of known reward variances and bound its regret (Theorem 1). The bound scales as

$\sqrt{n \log n} \sqrt{\sum_{i=1}^K \sigma_i^2 \log \left( 1 + n \frac{\sigma_{0,i}^2}{\sigma_i^2} \right)}$ . Therefore, it goes to zero as the reward variances  $\sigma_i^2$  or the prior variances of the mean arm rewards  $\sigma_{0,i}^2$  decrease. Our main contribution is VarTS, a variance-adaptive TS algorithm for Gaussian bandits with unknown heterogeneous reward variances. The algorithmic novelty lies in maintaining a joint Gaussian-Gamma posterior for the mean and variance of rewards of each arm. We prove a Bayes regret bound for VarTS (Theorem 2) that scales similarly to the known variance bound. More specifically, it is  $\sqrt{n \log n} \sqrt{\sum_{i=1}^K \frac{\beta_{0,i}}{\alpha_{0,i}-1} \log \left( 1 + \frac{n}{\kappa_{0,i}} \right)}$ , where  $\frac{\beta_{0,i}}{\alpha_{0,i}-1}$  is a proxy for the reward variance  $\sigma_i^2$  and  $\kappa_{0,i}^{-1}$  plays the role of  $\sigma_{0,i}^2/\sigma_i^2$ . Our bound captures the effect of the prior on learning reward variances and is the first such bound.

Potential future directions include extending our framework to infinite arms, which would require a different set of assumptions on the priors and reward distributions for tractable solutions. Another very practical and general direction would be incorporating context and changing reward variances over time, as in Kim et al. (2022); Zhao et al. (2022; 2023); Zhang et al. (2021).

## REFERENCES

- Yasin Abbasi-Yadkori, David Pal, and Csaba Szepesvari. Improved algorithms for linear stochastic bandits. In *Advances in Neural Information Processing Systems 24*, pp. 2312–2320, 2011.
- Shipra Agrawal and Navin Goyal. Analysis of Thompson sampling for the multi-armed bandit problem. In *Proceedings of the 25th Annual Conference on Learning Theory*, pp. 39.1–39.26, 2012.
- Shipra Agrawal and Navin Goyal. Further optimal regret bounds for Thompson sampling. In *Proceedings of the 16th International Conference on Artificial Intelligence and Statistics*, pp. 99–107, 2013a.
- Shipra Agrawal and Navin Goyal. Thompson sampling for contextual bandits with linear payoffs. In *Proceedings of the 30th International Conference on Machine Learning*, pp. 127–135, 2013b.
- Alexia Atsidakou, Branislav Kveton, Sumeet Katariya, Constantine Caramanis, and Sujay Sanghavi. Finite-time logarithmic Bayes regret upper bounds. In *Advances in Neural Information Processing Systems 36*, 2023.
- Jean-Yves Audibert, Sébastien Bubeck, et al. Minimax policies for adversarial and stochastic bandits. In *COLT*, volume 7, pp. 1–122, 2009a.
- Jean-Yves Audibert, Rémi Munos, and Csaba Szepesvári. Exploration–exploitation tradeoff using variance estimates in multi-armed bandits. *Theoretical Computer Science*, 410(19):1876–1902, 2009b.
- Peter Auer. Using confidence bounds for exploitation-exploration trade-offs. *Journal of Machine Learning Research*, 3:397–422, 2002.
- Peter Auer, Nicolo Cesa-Bianchi, and Paul Fischer. Finite-time analysis of the multiarmed bandit problem. *Machine Learning*, 47:235–256, 2002.
- Sébastien Bubeck and Che-Yu Liu. Prior-free and prior-dependent regret bounds for Thompson sampling. *Advances in neural information processing systems*, 26, 2013.
- Sebastien Bubeck, Remi Munos, and Gilles Stoltz. Pure exploration in multi-armed bandits problems. In *Proceedings of the 20th International Conference on Algorithmic Learning Theory*, pp. 23–37, 2009.
- Olivier Chapelle and Lihong Li. An empirical evaluation of Thompson sampling. In *Advances in Neural Information Processing Systems 24*, pp. 2249–2257, 2011.
- John D Cook. Inverse gamma distribution. online: [http://www.johndcook.com/inverse\\_gamma.pdf](http://www.johndcook.com/inverse_gamma.pdf), Tech. Rep, 2008.
- Marco Faella, Alberto Finzi, and Luigi Sauro. Rapidly finding the best arm using variance. In *Proceedings of the 24th European Conference on Artificial Intelligence*, 2020.
- Victor Gabillon, Mohammad Ghavamzadeh, Alessandro Lazaric, and Sebastien Bubeck. Multi-bandit best arm identification. In *Advances in Neural Information Processing Systems 24*, 2011.
- Aurelien Garivier and Olivier Cappe. The KL-UCB algorithm for bounded stochastic bandits and beyond. In *Proceedings of the 24th Annual Conference on Learning Theory*, pp. 359–376, 2011.
- Andrew Gelman and Jennifer Hill. *Data Analysis Using Regression and Multilevel/Hierarchical Models*. Cambridge University Press, New York, NY, 2007.
- Junya Honda and Akimichi Takemura. Optimality of Thompson sampling for Gaussian bandits depends on priors. In *Proceedings of the 17th International Conference on Artificial Intelligence and Statistics*, 2014.
- Joey Hong, Branislav Kveton, Sumeet Katariya, Manzil Zaheer, and Mohammad Ghavamzadeh. Deep hierarchy in bandits. In *Proceedings of the 39th International Conference on Machine Learning*, 2022a.

- Joey Hong, Branislav Kveton, Manzil Zaheer, and Mohammad Ghavamzadeh. Hierarchical Bayesian bandits. In *Proceedings of the 25th International Conference on Artificial Intelligence and Statistics*, 2022b.
- Tianyuan Jin, Pan Xu, Jieming Shi, Xiaokui Xiao, and Quanquan Gu. Mots: Minimax optimal Thompson sampling. In *International Conference on Machine Learning*, pp. 5074–5083. PMLR, 2021.
- Tianyuan Jin, Xianglin Yang, Xiaokui Xiao, and Pan Xu. Thompson sampling with less exploration is fast and optimal. In *Proceedings of the 40th International Conference on Machine Learning*, 2023.
- Marc Jourdan, Remy Degenne, and Emilie Kaufmann. Dealing with unknown variances in best-arm identification. *CoRR*, abs/2210.00974, 2022. URL <https://arxiv.org/abs/2210.00974>.
- Yeoneung Kim, Insoon Yang, and Kwang-Sung Jun. Improved regret analysis for variance-adaptive linear bandits and horizon-free linear mixture MDPs. *Advances in Neural Information Processing Systems*, 35:1060–1072, 2022.
- Branislav Kveton, Mikhail Konobeev, Manzil Zaheer, Chih-Wei Hsu, Martin Mladenov, Craig Boutilier, and Csaba Szepesvári. Meta-Thompson sampling. In *Proceedings of the 38th International Conference on Machine Learning*, 2021.
- Tze Leung Lai. Adaptive treatment allocation and the multi-armed bandit problem. *The Annals of Statistics*, 15(3):1091–1114, 1987.
- Tze Leung Lai and Herbert Robbins. Asymptotically efficient adaptive allocation rules. *Advances in Applied Mathematics*, 6(1):4–22, 1985.
- Anusha Lalitha, Kousha Kalantari, Yifei Ma, Anoop Deoras, and Branislav Kveton. Fixed-budget best-arm identification with heterogeneous reward variances. In *Uncertainty in Artificial Intelligence*, pp. 1164–1173. PMLR, 2023.
- Tor Lattimore and Csaba Szepesvári. *Bandit algorithms*. Cambridge University Press, 2020.
- Pinyan Lu, Chao Tao, and Xiaojin Zhang. Variance-dependent best arm identification. In *Proceedings of the 37th Conference on Uncertainty in Artificial Intelligence*, 2021.
- Xiuyuan Lu and Benjamin Van Roy. Information-theoretic confidence bounds for reinforcement learning. In *Advances in Neural Information Processing Systems 32*, 2019.
- Pierre Ménard and Aurélien Garivier. A minimax and asymptotically optimal algorithm for stochastic bandits. In *International Conference on Algorithmic Learning Theory*, pp. 223–237. PMLR, 2017.
- Subhojyoti Mukherjee, KP Naveen, Nandan Sudarsanam, and Ravindran Balaraman. Efficient-ucbv: An almost optimal algorithm using variance estimates. *AAAI Conference on Artificial Intelligence*, 32, 2018.
- Kevin P Murphy. Conjugate Bayesian analysis of the Gaussian distribution. *def*, 1(2 $\sigma$ 2):16, 2007.
- Karl Pearson. Method of moments and method of maximum likelihood. *Biometrika*, 28(1/2):34–59, 1936.
- Pierre Perrault. When combinatorial Thompson sampling meets approximation regret. *Advances in Neural Information Processing Systems*, 35:17639–17651, 2022.
- Pierre Perrault, Etienne Boursier, Michal Valko, and Vianney Perchet. Statistical efficiency of Thompson sampling for combinatorial semi-bandits. *Advances in Neural Information Processing Systems*, 33:5429–5440, 2020.
- Daniel Russo and Benjamin Van Roy. Learning to optimize via posterior sampling. *Mathematics of Operations Research*, 39(4):1221–1243, 2014.

- Daniel Russo and Benjamin Van Roy. An information-theoretic analysis of Thompson sampling. *Journal of Machine Learning Research*, 17(68):1–30, 2016.
- Daniel Russo, Benjamin Van Roy, Abbas Kazerouni, Ian Osband, and Zheng Wen. A tutorial on Thompson sampling. *Foundations and Trends in Machine Learning*, 11(1):1–96, 2018.
- Aadirupa Saha, Pierre Gaillard, and Michal Valko. Improved sleeping bandits with stochastic action sets and adversarial rewards. In *International Conference on Machine Learning*, pp. 8357–8366. PMLR, 2020.
- William R. Thompson. On the likelihood that one unknown probability exceeds another in view of the evidence of two samples. *Biometrika*, 25(3-4):285–294, 1933.
- Runzhe Wan, Lin Ge, and Rui Song. Metadata-based multi-task bandits with Bayesian hierarchical models. In *Advances in Neural Information Processing Systems 34*, 2021.
- Zihan Zhang, Jiaqi Yang, Xiangyang Ji, and Simon S Du. Improved variance-aware confidence sets for linear bandits and linear mixture MDP. *Advances in Neural Information Processing Systems*, 34:4342–4355, 2021.
- Heyang Zhao, Dongruo Zhou, Jiafan He, and Quanquan Gu. Bandit learning with general function classes: Heteroscedastic noise and variance-dependent regret bounds. 2022.
- Heyang Zhao, Jiafan He, Dongruo Zhou, Tong Zhang, and Quanquan Gu. Variance-dependent regret bounds for linear bandits and reinforcement learning: Adaptivity and computational efficiency. *arXiv preprint arXiv:2302.10371*, 2023.
- Ruida Zhou and Chao Tian. Approximate top- $m$  arm identification with heterogeneous reward variances. In *Proceedings of the 25th International Conference on Artificial Intelligence and Statistics*, 2022.
- Qiuyu Zhu and Vincent Tan. Thompson sampling algorithms for mean-variance bandits. In *International Conference on Machine Learning*, pp. 11599–11608. PMLR, 2020.

# SUPPLEMENTARY FOR

## ONLY PAY FOR WHAT IS UNCERTAIN: VARIANCE-ADAPTIVE THOMPSON SAMPLING

### A ALGORITHM PSEUDOCODE FOR SECTION 4

---

**Algorithm 1** Gaussian TS for known reward variances.

---

```

1: Inputs: Prior means  $\mu_0$ , prior variances  $\sigma_0^2$ , and reward variances  $\sigma^2$ 
2: Init:  $\forall i \in [K] : N_1(i) := 0, \hat{\mu}_{1,i} := \mu_{0,i}, \sigma_{1,i} := \sigma_{0,i}, \bar{x}_{1,i} := 0$ 
3: for  $t = 1, \dots, n$  do
4:   Posterior sampling:  $\forall i \in [K] : \tilde{\mu}_{t,i} \sim \mathcal{N}(\hat{\mu}_{t,i}, \sigma_{t,i}^2)$ 
5:   Pull:  $A_t := \arg \max_{i \in [K]} \tilde{\mu}_{t,i}$ 
6:   Reward feedback:  $x_{t,A_t} \sim \mathcal{N}(\mu_{A_t}, \sigma_{A_t}^2)$ 
7:   for  $i = 1, \dots, K$  do ▷ Posterior update
8:      $N_{t+1}(i) := N_t(i) + \mathbb{1}\{A_t = i\}$ 
9:      $\bar{x}_{t+1,i} := \frac{1}{N_{t+1}(i)} \sum_{s=1}^t \mathbb{1}\{A_s = i\} x_{s,i}$ 
10:     $\sigma_{t+1,i}^2 := \frac{1}{\sigma_{0,i}^{-2} + N_{t+1}(i)\sigma_i^{-2}}$ 
11:     $\hat{\mu}_{t+1,i} := \sigma_{t+1,i}^2 \left( \frac{\mu_{0,i}}{\sigma_{0,i}^2} + \frac{N_{t+1}(i)\bar{x}_{t+1,i}}{\sigma_i^2} \right)$ 

```

---

### B ADDITIONAL PROOFS FOR SECTION 4

**Theorem 1** (Variance-dependent regret bound for known variances). *Consider the above setting. Then for any  $\delta > 0$ , the Bayes regret of Gaussian TS is bounded as:*

$$R_n \leq \sum_{i=1}^K \sqrt{\frac{2\sigma_{0,i}^2}{\pi}} n\delta + \sqrt{2n} \sqrt{\sum_{i=1}^K \sigma_i^2 \left( \log(1 + n\sigma_{0,i}^2\sigma_i^{-2}) + \sigma_{0,i}^2\sigma_i^{-2} \right) \log(1/\delta)}.$$

*Proof of Theorem 1.* Recall that we denote by  $\hat{\mu}_t \in \mathbb{R}^K$  the MAP estimate of  $\mu$  at round  $t$ , and let  $\mu_t \in \mathbb{R}^K$  be a random posterior sample in round  $t$  such that  $\mu_{t,i} \sim \mathcal{N}(\hat{\mu}_{t,i}, \sigma_{t,i}^2)$  for all  $i \in [K]$ .  $H_t$  denotes the history in round  $t$ . Note that in posterior sampling, for any vector  $\nu \in \mathbb{R}^K$ ,  $\mathbb{P}(\mu_t = \nu | H_t) = \mathbb{P}(\mu = \nu | H_t)$ . Let  $A^*$  be the optimal arm under the realized reward vector  $\mu$  and  $A_t$  be the optimal arm under  $\mu_t$  (and hence pulled by the TS algorithm at round  $t$ ).

We rely on several properties of Gaussian posterior sampling with a diagonal prior covariance matrix. Specifically, by Lemma 7 of Murphy (2007), the posterior distribution in round  $t$  is  $\mathcal{N}(\hat{\mu}_t, \Sigma_t)$ , where  $\Sigma_t = \text{diag}((\sigma_{t,i}^2)_{i=1}^K)$  is a diagonal covariance matrix with non-zero entries:

$$\sigma_{t,i}^2 = \frac{1}{\sigma_{0,i}^{-2} + N_t(i)\sigma_i^{-2}} = \frac{\sigma_i^2}{\sigma_i^2\sigma_{0,i}^{-2} + N_t(i)},$$

and  $N_t(i) = \sum_{s=1}^{t-1} \mathbb{1}\{A_s = i\}$  denotes the number of pulls of arm  $i$  up to round  $t$ . Accordingly, a high-probability confidence interval of arm  $i$  in round  $t$  is  $C_t(i) = \sqrt{2\sigma_{t,i}^2 \log(1/\delta)}$ , where  $\delta > 0$  is the confidence level. Let us define an event:

$$E_t = \{\forall i \in [K] : |\mu_i - \hat{\mu}_{t,i}| \leq C_t(i)\},$$

that implies that all confidence intervals in round  $t$  hold.

Fix round  $t$ . Now we bound the regret in round  $t$  as follows. We start by noting that the regret can be decomposed as:

$$\begin{aligned}\mathbb{E}[\mu_{A^*} - \mu_{A_t}] &= \mathbb{E}[\mathbb{E}[\mu_{A^*} - \mu_{A_t} \mid H_t]] \\ &= \mathbb{E}[\mathbb{E}[\mu_{A^*} - \hat{\mu}_{t,A^*} \mid H_t]] + \mathbb{E}[\mathbb{E}[\hat{\mu}_{t,A^*} - \mu_{A_t} \mid H_t]] \\ &= \mathbb{E}[\mathbb{E}[\mu_{A^*} - \hat{\mu}_{t,A^*} \mid H_t]].\end{aligned}$$

The last equality holds since given  $H_t$ , clearly  $\mathbb{E}[\mu_i \mid H_t] = \hat{\mu}_{t,i}$  for any  $i \in [K]$ .

Now let us deal with the remaining term in the decomposition. Fix history  $H_t$ . Then we introduce the event  $E_t$  and get

$$\begin{aligned}\mathbb{E}[\mu_{A^*} - \hat{\mu}_{t,A^*} \mid H_t] &= \mathbb{E}[(\mu_{A^*} - \hat{\mu}_{t,A^*})\mathbb{1}\{\bar{E}_t\} \mid H_t] + \mathbb{E}[(\mu_{A^*} - \hat{\mu}_{t,A^*})\mathbb{1}\{E_t\} \mid H_t] \\ &\leq \mathbb{E}[(\mu_{A^*} - \hat{\mu}_{t,A^*})\mathbb{1}\{\bar{E}_t\} \mid H_t] + \mathbb{E}[C_t(A_t) \mid H_t],\end{aligned}$$

where the inequality follows from the observation that

$$\mathbb{E}[(\mu_{A^*} - \hat{\mu}_{t,A^*})\mathbb{1}\{E_t\} \mid H_t] \leq \mathbb{E}[C_t(A^*) \mid H_t],$$

and further  $A_t \mid H_t$  and  $A^* \mid H_t$  have the same distributions given  $H_t$  and  $C_t(\cdot)$  is a constant given  $H_t$ . Now note since  $\mu - \hat{\mu}_t \mid H_t \sim \mathcal{N}(\mathbf{0}, \Sigma_t)$ , we further have

$$\begin{aligned}\mathbb{E}[(\mu_{A^*} - \hat{\mu}_{t,A^*})\mathbb{1}\{\bar{E}_t\} \mid H_t] &\leq \sum_{i=1}^K \frac{1}{\sqrt{2\pi\sigma_{t,i}^2}} \int_{x=C_t(i)}^{\infty} x \exp\left[-\frac{x^2}{2\sigma_{t,i}^2}\right] dx \\ &= \sum_{i=1}^K -\sqrt{\frac{\sigma_{t,i}^2}{2\pi}} \int_{x=C_t(i)}^{\infty} \frac{\partial}{\partial x} \left( \exp\left[-\frac{x^2}{2\sigma_{t,i}^2}\right] \right) dx \\ &= \sum_{i=1}^K \sqrt{\frac{\sigma_{t,i}^2}{2\pi}} \delta \leq \sqrt{\frac{\sigma_{0,i}^2}{2\pi}} \delta.\end{aligned}\tag{3}$$

Now we chain all inequalities for the regret in round  $t$  and get

$$\mathbb{E}[\mu_{A^*} - \mu_{A_t}] \leq \mathbb{E}[C_t(A_t)] + \sum_{i=1}^K \sqrt{\frac{2\sigma_{0,i}^2}{\pi}} \delta.$$

Therefore, the  $n$ -round Bayes regret is bounded as

$$\mathbb{E}\left[\sum_{t=1}^n \mu_{A^*} - \mu_{A_t}\right] \leq \mathbb{E}\left[\sum_{t=1}^n C_t(A_t)\right] + \sum_{i=1}^K \sqrt{\frac{2\sigma_{0,i}^2}{\pi}} n\delta.$$

The last part is to bound  $\mathbb{E}[\sum_{t=1}^n C_t(A_t)]$ . Since the confidence interval  $C_t(i)$  decreases with each pull of arm  $i$ ,  $\sum_{t=1}^n C_t(A_t)$  is bounded for any  $\mu$  by pulling arms in a round robin (Russo & Van Roy, 2014), which yields

$$\begin{aligned}\mathbb{E}\left[\sum_{t=1}^n C_t(A_t)\right] &= \mathbb{E}\left[\sum_{t=1}^n \sum_{i=1}^K \mathbb{1}\{A_t = i\} C_t(i)\right] = \mathbb{E}\left[\sum_{i=1}^K \sum_{t=1}^n \mathbb{1}\{A_t = i\} C_t(i)\right] \\ &\leq \mathbb{E}\left[\sum_{i=1}^K \sqrt{N_{n+1}(i) \sum_{t=1}^n C_t^2(i) \mathbb{1}\{A_t = i\}}\right] \\ &= \mathbb{E}\left[\sum_{i=1}^K \sqrt{N_{n+1}(i) \sum_{t=1}^n \frac{2\sigma_i^2}{\sigma_i^2 \sigma_{0,i}^{-2} + N_t(i)} \log(1/\delta) \mathbb{1}\{A_t = i\}}\right]\end{aligned}$$

$$\begin{aligned}
&= \mathbb{E} \left[ \sum_{i=1}^K \sqrt{2N_{n+1}(i)\sigma_i^2 \sum_{s=1}^{N_{n+1}(i)} \frac{1}{\sigma_i^2\sigma_{0,i}^{-2} + s} \log(1/\delta) + \frac{\sigma_{0,i}^2}{\sigma_i^2} \log(1/\delta)} \right] \\
&\leq \mathbb{E} \left[ \sum_{i=1}^K \sqrt{2N_{n+1}(i)\sigma_i^2 \sum_{s=1}^n \frac{1}{\sigma_i^2\sigma_{0,i}^{-2} + s} \log(1/\delta) + \frac{\sigma_{0,i}^2}{\sigma_i^2} \log(1/\delta)} \right] \\
&\stackrel{(a)}{\leq} \mathbb{E} \left[ \sum_{i=1}^K \sqrt{2N_{n+1}(i)\sigma_i^2 \left( \log(1 + n\sigma_{0,i}^2\sigma_i^{-2}) + \sigma_{0,i}^2\sigma_i^{-2} \right) \log(1/\delta)} \right] \\
&= \mathbb{E} \left[ \sum_{i=1}^K \sqrt{2N_{n+1}(i)\sigma_i^2 \left( \log(1 + n\sigma_{0,i}^2\sigma_i^{-2}) + \sigma_{0,i}^2\sigma_i^{-2} \right) \log(1/\delta)} \right] \\
&\leq \sqrt{2n \sum_{i=1}^K \sigma_i^2 \left( \log(1 + n\sigma_{0,i}^2\sigma_i^{-2}) + \sigma_{0,i}^2\sigma_i^{-2} \right) \log(1/\delta)},
\end{aligned}$$

where the first and the last inequalities follow due to Cauchy-Schwarz, and Inequality (a) is due to Lemma 9. Chaining all inequalities completes the proof.  $\square$

## C ALGORITHM PSEUDOCODE FOR SECTION 5

---

**Algorithm 2** VarTS: Gaussian-Gamma TS for unknown reward variances.

---

- 1: **Inputs:** Prior means  $\mu_0$ , prior precision  $\kappa_0$ , prior shape  $\alpha_0$ , and prior rate  $\beta_0$
  - 2: **Init:**  $\forall i \in [K] : N_1(i) := 0, \hat{\mu}_{1,i} := \mu_{0,i}, \kappa_{1,i} := \kappa_{0,i}, \alpha_{1,i} := \alpha_{0,i}, \beta_{1,i} := \beta_{0,i}, \bar{x}_{1,i} := 0$
  - 3: **for**  $t = 1, \dots, n$  **do**
  - 4:   Posterior sampling:  $\forall i \in [K] : \lambda_{t,i} \sim \text{Gam}(\alpha_{t,i}, \beta_{t,i}), \tilde{\mu}_{t,i} \sim \mathcal{N}(\hat{\mu}_{t,i}, \frac{1}{\kappa_{t,i}\lambda_{t,i}})$
  - 5:   Pull:  $A_t := \arg \max_{i \in [K]} \tilde{\mu}_{t,i}$
  - 6:   Reward feedback:  $x_{t,A_t} \sim \mathcal{N}(\mu_{A_t}, \sigma_{A_t}^2)$
  - 7:   **for**  $i = 1, \dots, K$  **do**  $\triangleright$  Posterior update
  - 8:      $N_{t+1}(i) := N_t(i) + \mathbb{1}\{A_t = i\}$
  - 9:      $\bar{x}_{t+1,i} := \frac{1}{N_{t+1}(i)} \sum_{s=1}^t \mathbb{1}\{A_s = i\} x_{s,i}$
  - 10:     $\alpha_{t+1,i} := \alpha_{0,i} + N_{t+1}(i)/2$
  - 11:     $\beta_{t+1,i} := \beta_{0,i} + \frac{1}{2} \sum_{s=1}^t \mathbb{1}\{A_s = i\} (x_{s,i} - \bar{x}_{t+1,i})^2 + \frac{\kappa_{0,i}N_{t+1}(i)(\bar{x}_{t+1,i} - \mu_{0,i})^2}{2(\kappa_{0,i} + N_{t+1}(i))}$
  - 12:     $\kappa_{t+1,i} := \kappa_{0,i} + N_{t+1}(i)$
  - 13:     $\hat{\mu}_{t+1,i} := \frac{\kappa_{0,i}\mu_{0,i} + N_{t+1}(i)\bar{x}_{t+1,i}}{\kappa_{0,i} + N_{t+1}(i)}$
- 

## D ADDITIONAL PROOFS FOR SECTION 5

**Theorem 2** (Variance-dependent regret bound for unknown variances). *Consider the above setting and let  $\alpha_{0,i} \geq 1$  for all arms  $i \in [K]$ . Then for any  $\delta > 0$ , the Bayes regret of VarTS is bounded as:*

$$R_n \leq C\sqrt{n \log(1/\delta)} + \delta C\sqrt{nk/(2\pi)},$$

where  $C^2 = \sum_{i=1}^K \frac{\beta_{0,i}}{\alpha_{0,i}-1} \left( \frac{2}{\kappa_{0,i}} + \frac{0.5}{\kappa_{0,i}(\alpha_{0,i}-1)} + 5 \log \left( 1 + \frac{n}{\kappa_{0,i}} \right) \right)$  is a prior-dependent constant.

*Proof of Theorem 2.* We split the proof into three main parts, as described below:

**Part-I: Notation, and Decomposing the Regret into Confidence Bounds and Low-probability Events:** We start by recalling that the posterior updates are (Murphy, 2007):

$$\mu_{t,i} = \frac{\kappa_{0,i}\mu_{0,i} + N_t(i)\bar{x}_{t,i}}{\kappa_{0,i} + N_t(i)}$$

$$\begin{aligned}
\kappa_{t,i} &= \kappa_{0,i} + N_t(i) \\
\alpha_{t,i} &= \alpha_{0,i} + N_t(i)/2 \\
\beta_{t,i} &= \beta_{0,i} + \frac{1}{2} \sum_{t=1}^T \mathbb{1}\{A_t = i\} (x_{t,i} - \bar{x}_{t,i})^2 + \frac{\kappa_{0,i} N_t(i) (\bar{x}_{t,i} - \mu_{0,i})^2}{2(\kappa_{0,i} + N_t(i))},
\end{aligned}$$

where  $N_t(i) = \sum_{s=1}^{t-1} \mathbb{1}\{A_s = i\}$  denotes the number of pulls of arm  $i$  up to round  $t$ , and  $\bar{x}_{t,i} = \frac{1}{N_t(i)} \sum_{s=1}^{t-1} \mathbb{1}\{A_s = i\} x_{s,i}$  is the empirical mean reward of arm  $i$  at round  $t$ . Thus given  $(\kappa_t, \lambda_t)$ , we have:

$$\mu_i - \hat{\mu}_{t,i} \sim \mathcal{N}(0, (\kappa_{t,i} \lambda_{t,i})^{-1}),$$

where  $\lambda_{t,i} \sim \text{Gam}(\alpha_{t,i}, \beta_{t,i})$ .

As in the proof of Theorem 1, we can break the regret in round  $t$  as:

$$\begin{aligned}
\mathbb{E}[\mu_{A^*} - \mu_{A_t}] &= \mathbb{E}[\mathbb{E}[\mu_{A^*} - \mu_{A_t} | H_t]] \\
&= \mathbb{E}[\mathbb{E}[\mu_{A^*} - \hat{\mu}_{t,A^*} | H_t]] + \mathbb{E}[\mathbb{E}[\hat{\mu}_{t,A^*} - \mu_{A_t} | H_t]], \\
&= \mathbb{E}[\mathbb{E}[\mu_{A^*} - \hat{\mu}_{t,A^*} | H_t]] + \mathbb{E}[\mathbb{E}_{\sigma}[\mathbb{E}[\hat{\mu}_{t,A^*} - \mu_{A_t} | \sigma] | H_t]], \\
&= \mathbb{E}[\mathbb{E}[\mu_{A^*} - \hat{\mu}_{t,A^*} | H_t]]
\end{aligned} \tag{4}$$

where  $\sigma_{t,i}^2$  is defined as  $\sigma_{t,i}^2 = \frac{1}{\kappa_{t,i} \lambda_{t,i}}$  and is a ‘sampled posterior variance’, (where recall  $\lambda_{t,i} \sim \text{Gam}(\alpha_{t,i}, \beta_{t,i})$ ). The last equality holds since given  $H_t$  and  $\sigma$ ,  $\mathbb{E}[\mu_i | H_t, \sigma] = \hat{\mu}_{t,i}$  for any  $i \in [K]$  by definition of the posterior update.

Note that the regret expression from equation 4 can be actually decomposed based on  $E_t$  and  $\bar{E}_t$  as:

$$\begin{aligned}
&\mathbb{E}[\hat{\mu}_{t,A^*} - \mu_{A^*} | H_t] \\
&\leq \mathbb{E}[(\hat{\mu}_{t,A^*} - \mu_{A^*}) \mathbb{1}\{E_t\} | H_t] + \mathbb{E}[(\hat{\mu}_{t,A^*} - \mu_{A^*}) \mathbb{1}\{\bar{E}_t\} | H_t] \\
&\leq \mathbb{E}[C_t(A^*) | H_t] + \mathbb{E}[(\hat{\mu}_{t,A^*} - \mu_{A^*}) \mathbb{1}\{\bar{E}_t\} | H_t] \\
&= \mathbb{E}[C_t(A_t) | H_t] + \mathbb{E}[(\hat{\mu}_{t,A^*} - \mu_{A^*}) \mathbb{1}\{\bar{E}_t\} | H_t],
\end{aligned} \tag{5}$$

where the last equality follows from the fact that given  $H_t$ ,  $A_t | H_t$  and  $A^* | H_t$  have the same distributions, as both  $\hat{\mu}_{t,i}$  and  $\mu_{t,i}$  can be seen as independent posterior samples from a  $\text{NG}(\hat{\mu}_{t,i}, \kappa_{t,i}, \alpha_{t,i}, \beta_{t,i})$  distribution marginalized over  $\lambda$ .

Thus we can bound the total cumulative regret over  $n$  rounds can be bounded by sum over confidence bounds and low-probability event terms as:

$$\sum_{t=1}^n \mathbb{E}[\hat{\mu}_{t,A^*} - \mu_{A^*} | H_t] \leq \sum_{t=1}^n \mathbb{E} \left[ \mathbb{E}[C_t(A_t) | H_t] + \mathbb{E}[(\hat{\mu}_{t,A^*} - \mu_{A^*}) \mathbb{1}\{\bar{E}_t\} | H_t] \right] \tag{6}$$

**Part-II: Upper Bounding the Low-probability Event Terms:** Now given  $H_t$  and  $\sigma_t$ , let us define the high-probability confidence interval of each arm  $i$  as  $C_t(i) = \sqrt{2\sigma_{t,i}^2 \log(1/\delta)}$ , and the ‘good event’  $E_t = \{\forall i \in [K] : |\mu_i - \hat{\mu}_{t,i}| \leq C_t(i)\}$ , same as what we introduced in the proof of Theorem 1. Furthermore, given  $H_t$  and  $\sigma_{t,i}^2$  (or equivalently  $\lambda_{t,i}$ ),  $\mu_i - \hat{\mu}_{t,i} | \sigma_{t,i}^2, H_t \sim \mathcal{N}(0, \sigma_{t,i}^2)$ , since given  $H_t$  and  $\sigma_t$ , has the posterior  $\mu_i \sim \mathcal{N}(\hat{\mu}_{t,i}, \sigma_{t,i}^2)$ .

$$\mathbb{E}[(\mu_{A^*} - \hat{\mu}_{t,A^*}) \mathbb{1}\{\bar{E}_t\} | \sigma_t, H_t] \leq \sum_{i=1}^K \sqrt{\frac{\sigma_{t,i}^2}{2\pi}} \delta. \tag{7}$$

Taking expectation over  $H_n, \sigma, \mu$ , and summing over  $t = 1, 2, \dots, n$  we get:

$$\mathbb{E} \left[ \sum_{t=1}^n (\mu_{A^*} - \hat{\mu}_{t,A^*}) \mathbb{1}\{\bar{E}_t\} \right]$$



$$\begin{aligned}
&\leq \delta(2\pi)^{-1/2} \mathbb{E} \left[ \sum_{t=1}^n \sum_{i=1}^K \mathbb{E}[\sigma_{t,i}] \right] \\
&= \delta(2\pi)^{-1/2} \mathbb{E} \left[ \sum_{t=1}^n \sum_{i=1}^K \mathbb{E} \left[ \sqrt{\frac{1}{2\kappa_{t,i}\lambda_{t,i}}} \right] \right] \\
&\leq \delta(2\pi)^{-1/2} \mathbb{E} \left[ \sum_{t=1}^n \sum_{i=1}^K \left[ \sqrt{\mathbb{E}_{\lambda_{t,i}} \left[ \frac{1}{2\kappa_{t,i}\lambda_{t,i}} \right]} \right] \right] \\
&\stackrel{(1)}{=} \delta(2\pi)^{-1/2} \mathbb{E} \left[ \sum_{i=1}^K \sum_{t=1}^n \sqrt{\frac{\beta_{t,i}}{2\kappa_{t,i}(\alpha_{t,i} - 1)}} \right] \\
&\stackrel{(2)}{\leq} \delta(2\pi)^{-1/2} \sqrt{nK \mathbb{E} \left[ \sum_{t=1}^n \sum_{i=1}^K \frac{\beta_{t,i}}{2\kappa_{t,i}(\alpha_{t,i} - 1)} \right]} = \\
&\frac{\delta}{\sqrt{2\pi}} \sqrt{nK \mathbb{E} \left[ \sum_{i=1}^K \sum_{\tau=1}^n \frac{2\beta_{0,i} + \sum_{t \in [\tau]} \mathbb{1}\{A_t = i\} (x_{\tau,i} - \bar{x}_{\tau,i})^2 + \kappa_{0,i}[(\bar{x}_{\tau,i} - \mu_i)^2 + (\mu_i - \mu_{0,i})^2]}{2\kappa_{t,i}(\alpha_{0,i} + N_{\tau}(i)/2 - 1)} \right]},
\end{aligned}$$

where (1) holds since  $1/\lambda_{t,i}$  follows Inverse-Gamma( $\alpha_{t,i}, \beta_{t,i}$ ) and thus we can apply Lemma 4 (note we assumed  $\alpha_{0,i} > 1$ , which implies  $\alpha_{t,i} > 1, \forall t \in [T]$ ). (2) applies by successive application of Cauchy-Schwarz and pushing the expectation under square-root by Jensen's inequality.

Further, applying the posterior update forms from Algorithm 2, we get:

$$\begin{aligned}
&\frac{\sqrt{2\pi}}{\delta} \mathbb{E} \left[ \sum_{t=1}^n (\mu_{A^*} - \hat{\mu}_{t,A^*}) \mathbb{1}\{\bar{E}_t\} \right] \\
&\leq \sqrt{nK \mathbb{E} \left[ \sum_{i=1}^K \sum_{\tau=1}^n \frac{2\beta_{0,i} + \sum_{t \in [\tau]} \mathbb{1}\{A_t = i\} (x_{\tau,i} - \bar{x}_{\tau,i})^2 + \kappa_{0,i}[(\bar{x}_{\tau,i} - \mu_i)^2 + (\mu_i - \mu_{0,i})^2]}{2(\kappa_{0,i} + N_{\tau}(i))(\alpha_{0,i} + N_{\tau}(i)/2 - 1)} \right]} \\
&= \sqrt{nK \mathbb{E} \left[ \sum_{i=1}^K \mathbb{E} \left[ \sum_{s=0}^{N_{n+1}(i)} \frac{2\beta_{0,i} + \sum_{t=1}^s (x_{s,i} - \bar{x}_{s,i})^2 + \kappa_{0,i}[(\bar{x}_{s,i} - \mu_i)^2 + (\mu_i - \mu_{0,i})^2]}{(\kappa_{0,i} + s)(2\alpha_{0,i} + s - 2)} \right] \right]},
\end{aligned}$$

where we slightly abused the notation above to denote  $\bar{x}_{s,i} = \frac{1}{s} \sum_{t'=1}^s x_{t',i}$  for all  $s > 1$ . However, further to get rid of the randomness of  $N_{n+1}(i)$ , we can further upper bound the above expression as:

$$\begin{aligned}
&\frac{\sqrt{2\pi}}{\delta} \mathbb{E} \left[ \sum_{t=1}^n (\mu_{A^*} - \hat{\mu}_{t,A^*}) \mathbb{1}\{\bar{E}_t\} \right] \\
&\leq \sqrt{nK \mathbb{E} \left[ \sum_{i=1}^K \sum_{s=0}^n \frac{2\beta_{0,i} + \sum_{t=1}^s (x_{s,i} - \bar{x}_{s,i})^2 + \kappa_{0,i}[(\bar{x}_{s,i} - \mu_i)^2 + (\mu_i - \mu_{0,i})^2]}{(\kappa_{0,i} + s)(2\alpha_{0,i} + s - 2)} \right]},
\end{aligned} \tag{8}$$

which after following the proof argument of Lemma 6 we get:

$$\begin{aligned}
&\mathbb{E} \left[ \sum_{t=1}^n (\mu_{A^*} - \hat{\mu}_{t,A^*}) \mathbb{1}\{\bar{E}_t\} \right] \\
&\leq \frac{\delta \sqrt{nK}}{\sqrt{2\pi}} \times
\end{aligned} \tag{9}$$

$$\sqrt{\mathbb{E} \left[ \underbrace{\sum_{i=1}^K \frac{2\beta_{0,i} + \kappa_{0,i}(\mu_i - \mu_{0,i})^2}{2\kappa_{0,i}(\alpha_{0,i} - 1)}}_{(A)} + \underbrace{\sum_{i=1}^K \sum_{s=1}^n \frac{2\beta_{0,i} + \sigma_i^2(s-1) + \kappa_{0,i}[\frac{\sigma_i^2}{s} + (\mu_i - \mu_{0,i})^2]}{(\kappa_{0,i} + s)(2\alpha_{0,i} + s - 2)}}_{(B)} \right]}, \quad (10)$$

For the term (A), since  $\mu \sim \mathcal{N}(\mu_{0,i}, \frac{1}{\kappa_{0,i}\lambda_i})$ , where  $\lambda_i \sim \text{Gam}(\alpha_{0,i}, \beta_{0,i})$ , taking conditional expectation over  $\mu_i \mid \lambda_{0,i}$  and further over  $\lambda_{0,i}$  we get:

$$\mathbb{E}_{\lambda_i} \left[ \mathbb{E}_{\mu_i} \left[ \sum_{i=1}^K \frac{2\beta_{0,i} + \kappa_{0,i}(\mu_i - \mu_{0,i})^2}{2\kappa_{0,i}(\alpha_{0,i} - 1)} \mid \lambda_i \right] \right] = \sum_{i=1}^K \frac{2\beta_{0,i} + \mathbb{E}_{\lambda_i}[\lambda_i^{-1}]}{2\kappa_{0,i}(\alpha_{0,i} - 1)} = \sum_{i=1}^K \frac{2\beta_{0,i} + \frac{\beta_{0,i}}{\alpha_{0,i} - 1}}{2\kappa_{0,i}(\alpha_{0,i} - 1)},$$

where note the last equality holds since  $1/\lambda_i$  follows Inverse-Gamma( $\alpha_{0,i}, \beta_{0,i}$ ) and thus we can apply Lemma 4, given we assumed  $\alpha_{0,i} > 1$ .

To control term (B),

$$\begin{aligned} & \mathbb{E} \left[ \sum_{i=1}^K \sum_{s=1}^n \frac{2\beta_{0,i} + \sigma_i^2(s-1) + \kappa_{0,i}[\frac{\sigma_i^2}{s} + (\mu_i - \mu_{0,i})^2]}{(\kappa_{0,i} + s)(2\alpha_{0,i} + s - 2)} \right] \\ & \leq \mathbb{E} \left[ \sum_{i=1}^K \sum_{s=1}^n \frac{2\beta_{0,i} + \sigma_i^2 s + \kappa_{0,i}[\frac{\sigma_i^2}{s} + (\mu_i - \mu_{0,i})^2]}{(\kappa_{0,i} + s)(2\alpha_{0,i} + s - 2)} \right] \\ & \stackrel{(1)}{\leq} \sum_{i=1}^K \frac{\beta_{0,i}}{(\kappa_{0,i} + 1)(\alpha_{0,i} - 0.5)} + \sum_{i=1}^K \sum_{s=1}^n \frac{\beta_{0,i}/(\alpha_{0,i} - 1)}{\kappa_{0,i} + s} + \mathbb{E}_{\sigma} \left[ \sum_{i=1}^K \sum_{s=1}^n \frac{\sigma_i^2}{\kappa_{0,i} + s} \right] \\ & \quad + \mathbb{E}_{\sigma} \left[ \sum_{i=1}^K \sum_{s=1}^n \frac{\sigma_i^2}{s^2} \right] + \mathbb{E}_{\sigma} \left[ \sum_{i=1}^K \sum_{s=1}^n \frac{\mathbb{E}_{\mu}[(\mu_i - \mu_{0,i})^2 \mid \sigma]}{2(\alpha_{0,i} - 1) + s} \right] \\ & \stackrel{(2)}{\leq} \sum_{i=1}^K \frac{\beta_{0,i}}{(\kappa_{0,i} + 1)(\alpha_{0,i} - 0.5)} + \sum_{i=1}^K \frac{\beta_{0,i}}{\alpha_{0,i} - 1} \log \left( 1 + \frac{n}{\kappa_{0,i}} \right) + \left[ \sum_{i=1}^K \frac{\beta_{0,i}}{\alpha_{0,i} - 1} \log \left( 1 + \frac{n}{\kappa_{0,i}} \right) \right] \\ & \quad + \left[ \sum_{i=1}^K \frac{\beta_{0,i}}{(\alpha_{0,i} - 1)} \frac{\pi^2}{6} \right] + \mathbb{E}_{\sigma} \left[ \sum_{i=1}^K \kappa_{0,i} \frac{\sigma_i^2}{\kappa_{0,i}} \log \left( 1 + \frac{n}{\kappa_{0,i}} \right) \right] \\ & \leq \sum_{i=1}^K \frac{\beta_{0,i}}{\kappa_{0,i}(\alpha_{0,i} - 1)} + \sum_{i=1}^K \frac{(3 + \frac{\pi^2}{6})\beta_{0,i}}{(\alpha_{0,i} - 1)} \log \left( 1 + \frac{n}{\kappa_{0,i}} \right) \\ & \leq \sum_{i=1}^K \frac{\beta_{0,i}}{\kappa_{0,i}(\alpha_{0,i} - 1)} + \sum_{i=1}^K \frac{5\beta_{0,i}}{(\alpha_{0,i} - 1)} \log \left( 1 + \frac{n}{\kappa_{0,i}} \right) \end{aligned}$$

where Inequality (1) carefully uses the fact that  $2(\alpha_{0,i} - 1) > 0$  and  $\kappa_{0,i} > 0$  in the denominator terms, and Inequality (2) comes from repeated application of Lemma 9 and the fact that  $\sum_{x=1}^{\infty} 1/x^2 \leq \frac{\pi^2}{6}$ .

Then combining the above two derived upper bounds of term (A) and (B) to equation 9, we further have:

$$\begin{aligned} & \mathbb{E} \left[ \sum_{t=1}^n (\mu_{A^*} - \hat{\mu}_{t,A^*}) \mathbb{1}\{\bar{E}_t\} \right] \\ & \leq \frac{\delta\sqrt{nK}}{\sqrt{2\pi}} \sqrt{\sum_{i=1}^K \frac{4\beta_{0,i} + \frac{\beta_{0,i}}{\alpha_{0,i} - 1}}{2\kappa_{0,i}(\alpha_{0,i} - 1)} + \sum_{i=1}^K \frac{5\beta_{0,i}}{(\alpha_{0,i} - 1)} \log \left( 1 + \frac{n}{\kappa_{0,i}} \right)}. \end{aligned} \quad (11)$$

**Part-III: Upper Bounding Sum of Confidence Intervals:** Coming back to the main regret bound in equation 6, our remaining task is to bound the confidence terms (the first term in the right hand side of equation 6), which can be upper bounded as follows:

$$\begin{aligned}
\mathbb{E} \left[ \sum_{t=1}^n C_t(A_t) \right] &= \mathbb{E} \left[ \sum_{t=1}^n \sum_{i=1}^K \mathbb{1}\{A_t = i\} C_t(i) \right] = \mathbb{E} \left[ \sum_{i=1}^K \sum_{t=1}^n \mathbb{1}\{A_t = i\} C_t(i) \right] \\
&\stackrel{(1)}{\leq} \mathbb{E} \left[ \sum_{i=1}^K \sqrt{N_{n+1}(i)} \sqrt{\sum_{t=1}^n C_t^2(i) \mathbb{1}\{A_t = i\}} \right] \\
&\stackrel{(2)}{\leq} \mathbb{E} \left[ \sqrt{\sum_{i=1}^K N_{n+1}(i)} \sqrt{\sum_{i=1}^K \sum_{t=1}^n C_t^2(i) \mathbb{1}\{A_t = i\}} \right] \\
&\stackrel{(3)}{\leq} \sqrt{n \mathbb{E} \left[ \sum_{i=1}^K \sum_{t=1}^n 2\sigma_{t,i}^2 \log \frac{1}{\delta} \mathbb{1}\{A_t = i\} \right]} = \sqrt{n \mathbb{E} \left[ \sum_{i=1}^K \sum_{s=0}^{N_{n+1}(i)} (2\sigma_{t,i}^2 \log \frac{1}{\delta}) \right]} \\
&\leq \sqrt{n \mathbb{E} \left[ \sum_{i=1}^K \sum_{s=0}^n (2\sigma_{t,i}^2 \log \frac{1}{\delta}) \right]} \\
&\stackrel{(4)}{\leq} \sqrt{n \log \frac{1}{\delta} \sum_{i=1}^K \sum_{s=0}^n \mathbb{E} \left[ \frac{2\beta_{0,i} + \sum_{t=1}^s (x_{s,i} - \bar{x}_{s,i})^2 + \kappa_{0,i}[(\bar{x}_{s,i} - \mu_i)^2 + (\mu_i - \mu_{0,i})^2]}{(\kappa_{0,i} + s)(2\alpha_{0,i} + s - 2)} \right]} \\
&\leq \sqrt{n \log \frac{1}{\delta} \left[ \sum_{i=1}^K \frac{4\beta_{0,i} + \frac{\beta_{0,i}}{\alpha_{0,i}-1}}{2\kappa_{0,i}(\alpha_{0,i}-1)} + \sum_{i=1}^K \frac{5\beta_{0,i}}{(\alpha_{0,i}-1)} \log \left( 1 + \frac{n}{\kappa_{0,i}} \right) \right]},
\end{aligned}$$

where (1) and (2) uses Cauchy-Schwarz, (3) applies Jensen's inequality, the Inequality (4) above follows similar to the derivation of equation 8, and the inequality follows from a similar derivation as shown for equation 11 from equation 8.

Finally, chaining the above inequalities on the summation of the instantaneous regret over  $n$  rounds (see equation 5)

$$\begin{aligned}
&\mathbb{E} \left[ \sum_{t=1}^n \mathbb{E} [\hat{\mu}_{t,A^*} - \mu_{A^*} | H_t] \right] \\
&\leq \left( \frac{\delta \sqrt{nK}}{\sqrt{2\pi}} + \sqrt{n \log \frac{1}{\delta}} \right) \sqrt{\sum_{i=1}^K \frac{4\beta_{0,i} + \frac{\beta_{0,i}}{\alpha_{0,i}-1}}{2\kappa_{0,i}(\alpha_{0,i}-1)} + \sum_{i=1}^K \frac{5\beta_{0,i}}{(\alpha_{0,i}-1)} \log \left( 1 + \frac{n}{\kappa_{0,i}} \right)},
\end{aligned}$$

which proves the claim, noting  $C = \sum_{i=1}^K \frac{4\beta_{0,i} + \frac{\beta_{0,i}}{\alpha_{0,i}-1}}{2\kappa_{0,i}(\alpha_{0,i}-1)} + \sum_{i=1}^K \frac{5\beta_{0,i}}{(\alpha_{0,i}-1)} \log \left( 1 + \frac{n}{\kappa_{0,i}} \right)$ .  $\square$

#### D.1 ADDITIONAL CLAIMS USED IN THE PROOF OF THEOREM 2

**Lemma 3** (Murphy (2007)). *The joint distribution of  $(\mu, \lambda) \sim NG(\mu_0, \kappa_0, \alpha_0, \beta_0)$  is equivalent to the consecutive draw of  $\lambda \sim \text{Gam}(\alpha_0, \beta_0)$  followed by  $\mu \sim \mathcal{N}(\mu_0, (\kappa_0 \lambda)^{-1})$ ,  $(\mu_0, \kappa_0, \beta_0, \alpha_0)$  being the parameters of the Gaussian-Gamma distribution. In other words,*

$$NG(\mu, \lambda | \mu_0, \kappa_0, \alpha_0, \beta_0) = \mathcal{N}(\mu | \mu_0, (\kappa_0 \lambda)^{-1}) \text{Gam}(\lambda | \alpha_0, \beta_0)$$

**Lemma 4** (Cook (2008)). *Suppose  $X$  follows a  $\text{Gam}(\alpha, \beta)$  distribution with shape parameter  $\alpha > 0$  and rate parameter  $\beta > 0$ , then  $1/X$  follows an Inverse-Gamma( $\alpha, 1/\beta$ ) distribution. Moreover if  $\alpha > 1$ ,  $\mathbb{E}[1/X] = \frac{\beta}{\alpha-1}$ .*

**Lemma 5** (Cook (2008)). Let  $X_1, \dots, X_n$  are i.i.d.  $N(\mu, \sigma^2)$  random variables, (a). then

$$\sum_{i=1}^n \frac{(X_i - \bar{X}_n)^2}{\sigma^2} \sim \chi_{n-1}^2,$$

where  $\bar{X}_n = \frac{1}{n} \sum_{i=1}^n X_i$  is the sample mean of  $n$  random draws, and  $\chi_d^2$  is the chi-squared random variable with  $d$ -degrees of freedom (for any  $d \in \mathbb{N}_+$ ).

(b). Further if  $X \sim \chi_d^2$ , then  $\mathbb{E}[X] = d$ .

**Lemma 6.** For any  $i \in [K]$ , and round  $\tau \in [T]$ ,

$$\mathbb{E} \left[ \frac{\beta_{\tau,i}}{(\kappa_{\tau,i})(\alpha_{\tau,i} - 1)} \mid N_{\tau}(i) \right] \leq \mathbb{E} \left[ \frac{[2\beta_{0,i} + \sigma_i^2(N_{\tau}(i) - 1) + \kappa_{0,i}[\frac{\sigma_i^2}{N_{\tau,i}} + (\mu_i - \mu_{0,i})^2]]}{\kappa_{\tau,i}(2\alpha_{0,i} + 2N_{\tau}(i) - 2)} \mid N_{\tau}(i) \right]$$

*Proof.* We start by noting that for any  $i \in [K]$ ,

$$\begin{aligned} \mathbb{E} \left[ \mathbb{E}_{\sigma_{\tau}} [\sigma_{\tau,i} \mid H_{\tau}, \sigma] \right] &= \mathbb{E} \left[ \mathbb{E}_{\lambda_{\tau,i} \sim \text{Gam}(\alpha_{\tau,i}, \beta_{\tau,i})} \sqrt{\frac{1}{\kappa_{\tau,i} \lambda_{\tau,i}}} \mid H_{\tau}, \sigma \right] \\ &\leq \mathbb{E} \left[ \sqrt{\frac{1}{\kappa_{\tau,i}} \mathbb{E}_{\lambda_{\tau,i}} \left[ \frac{1}{\lambda_{\tau,i}} \right]} \mid H_{\tau}, \sigma \right] = \mathbb{E} \left[ \sqrt{\frac{1}{\kappa_{\tau,i}} \frac{\beta_{\tau,i}}{(\alpha_{\tau,i} - 1)}} \mid H_{\tau}, \sigma \right], \end{aligned}$$

where the last equality holds by the fact that given  $H_{\tau}$ ,  $\frac{1}{\lambda_{\tau,i}}$  follows the *Inverse-Gamma*( $\alpha_{\tau,i}, \beta_{\tau,i}^{-1}$ ) distribution and Lemma 4 Cook (2008). Now from the posterior update rules, given  $H_{\tau}$  we have:

$$\begin{aligned} \frac{\beta_{\tau,i}}{(\alpha_{\tau,i} - 1)} &\leq \frac{\beta_{0,i} + \frac{1}{2} \sum_{t \in [\tau]} \mathbb{1}\{A_t = i\} (x_{t,i} - \bar{x}_{\tau,i})^2 + \frac{\kappa_{0,i} N_t(i) (\bar{x}_{\tau,i} - \mu_{0,i})^2}{2(\kappa_{0,i} + N_{\tau}(i))}}{(\alpha_{0,i} + N_{\tau}(i)/2 - 1)} \\ &\leq \frac{2\beta_{0,i} + \sum_{t \in [\tau]} \mathbb{1}\{A_t = i\} (x_{t,i} - \bar{x}_{\tau,i})^2 + \kappa_{0,i}[(\bar{x}_{\tau,i} - \mu_i)^2 + (\mu_i - \mu_{0,i})^2]}{2(\alpha_{0,i} + N_{\tau}(i)/2 - 1)} \end{aligned}$$

Now given any fixed reward-precision  $\lambda_i \sim \text{Gam}(\alpha_{0,i}, \beta_{0,i})$ ,  $\sigma_i^2 = \frac{1}{\lambda_i}$ , mean-reward  $\mu_i \sim \mathcal{N}(\mu_{0,i}, \sigma_{0,i}^2)$ , and fixed number of pulls  $N_{\tau}(i) = s$  (say), note  $x_{t,i} \stackrel{iid}{\sim} \mathcal{N}(\mu_i, \sigma_i^2)$  can be seen as  $N_{\tau}(i) = s$  independent and identical draws from  $\mathcal{N}(\mu_i, \sigma_i^2)$ . Thus  $\sum_{t=1}^{\tau} \mathbb{1}\{A_t = i\} \frac{(x_{t,i} - \bar{x}_{\tau,i})^2}{\sigma_i^2} = \sum_{t=1}^s \frac{(x_{t,i} - \bar{x}_{\tau,i})^2}{\sigma_i^2}$  follows  $\chi^2(s-1)$ , i.e. chi-squared distribution with  $s-1$  degrees of freedom (see Lemma 5). Further using Lemma 5, part-(b) again, we know

$$\mathbb{E}_{x_{t,i} \sim \mathcal{N}(\mu_i, \sigma_i^2)} \left[ \sum_{t=1}^s \frac{(x_{t,i} - \bar{x}_{\tau,i})^2}{\sigma_i^2} \right] = (s-1).$$

Applying this to above chain of equations, note we get:

$$\begin{aligned} &\mathbb{E} \left[ \frac{\beta_{\tau,i}}{(\kappa_{\tau,i})(\alpha_{\tau,i} - 1)} \mid N_{\tau}(i) \right] \\ &= \mathbb{E} \left[ \frac{2\beta_{0,i} + \mathbb{E}_{x_{t,i} \sim \mathcal{N}(\mu_i, \sigma_i^2)} \left[ \sigma_i^2 \sum_{t=1}^{N_{\tau}(i)} \left( \frac{x_{t,i} - \bar{x}_{\tau,i}}{\sigma_i} \right)^2 \mid \mu_i, \sigma_i \right] + \kappa_{0,i}[(\bar{x}_{\tau,i} - \mu_i)^2 + (\mu_i - \mu_{0,i})^2]}{2(\kappa_{\tau,i})(\alpha_{0,i} + N_{\tau}(i)/2 - 1)} \mid N_{\tau}(i) \right] \\ &= \mathbb{E} \left[ \frac{[2\beta_{0,i} + \sigma_i^2(N_{\tau}(i) - 1) + \kappa_{0,i}[\mathbb{E}_{\bar{x}_{\tau,i} \sim \mathcal{N}(\mu, \sigma^2/N_{\tau}(i))}[(\bar{x}_{\tau,i} - \mu_i)^2 \mid \mu_i, \sigma_i] + (\mu_i - \mu_{0,i})^2]]}{2(\kappa_{\tau,i})(\alpha_{0,i} + N_{\tau}(i)/2 - 1)} \mid N_{\tau}(i) \right] \\ &\stackrel{(1)}{=} \mathbb{E} \left[ \frac{[2\beta_{0,i} + \sigma_i^2(N_{\tau}(i) - 1) + \kappa_{0,i}[\frac{\sigma_i^2}{N_{\tau,i}} + (\mu_i - \mu_{0,i})^2]]}{2(\kappa_{\tau,i})(\alpha_{0,i} + N_{\tau}(i)/2 - 1)} \mid N_{\tau}(i) \right] \end{aligned}$$

where (1) again follows since given  $\mu_i, \sigma_i$  and  $N_\tau(i)$  as before,  $x_{t,i} \stackrel{\text{iid}}{\sim} \mathcal{N}(\mu, \sigma^2)$ , and thus by definition  $\bar{x}_{\tau,i} = \frac{1}{N_\tau(i)} \sum_{t=1}^T \mathbf{1}\{A_t = i\} x_{t,i} \sim \mathcal{N}(\mu, \frac{\sigma^2}{N_\tau(i)})$ . This leads to  $\mathbb{E}_{\bar{x}_{\tau,i} \stackrel{\text{iid}}{\sim} \mathcal{N}(\mu, \sigma^2/N_\tau(i))} [\bar{x}_{\tau,i} - \mu_i]^2 = \frac{\sigma_i^2}{N_\tau(i)}$ . Thus the claim is concluded.  $\square$

## E TECHNICAL LEMMAS

**Lemma 7.** Let  $\mu_0 \sim \mathcal{N}(\hat{\mu}, \hat{\sigma}^2)$ ,  $\theta \mid \mu_0 \sim \mathcal{N}(\mu_0, \sigma_0^2)$ , and  $Y_i \mid \theta \sim \mathcal{N}(\theta, \sigma^2)$  for all  $i \in [n]$ . Then

$$\mu_0 \mid Y_1, \dots, Y_n \sim \mathcal{N}\left(\lambda^{-1} \left( \frac{\hat{\mu}}{\hat{\sigma}^2} + \frac{\sum_{i=1}^n Y_i}{n\sigma_0^2 + \sigma^2} \right), \lambda^{-1}\right), \quad \lambda = \frac{1}{\hat{\sigma}^2} + \left( \sigma_0^2 + \frac{\sigma^2}{n} \right)^{-1}.$$

*Proof.* The derivation is standard (Gelman & Hill, 2007) and we only include it for completeness. To simplify notation, let

$$v = \sigma^{-2}, \quad v_0 = \sigma_0^{-2}, \quad \hat{v} = \hat{\sigma}^{-2}, \quad c_1 = v_0 + nv, \quad c_2 = \hat{v} + v_0 - c_1^{-1}v_0^2.$$

The posterior distribution of  $\mu_0$  is

$$\begin{aligned} & \int_{\theta} \left( \prod_{i=1}^n \mathcal{N}(Y_i; \theta, \sigma^2) \right) \mathcal{N}(\theta; \mu_0, \sigma_0^2) d\theta \mathcal{N}(\mu_0; \hat{\mu}, \hat{\sigma}^2) \\ & \propto \int_{\theta} \exp \left[ -\frac{1}{2}v \sum_{i=1}^n (Y_i - \theta)^2 - \frac{1}{2}v_0(\theta - \mu_0)^2 \right] d\theta \exp \left[ -\frac{1}{2}\hat{v}(\mu_0 - \hat{\mu})^2 \right]. \end{aligned}$$

Let  $f(\mu_0)$  denote the integral. We solve it as

$$\begin{aligned} f(\mu_0) &= \int_{\theta} \exp \left[ -\frac{1}{2} \left( v \sum_{i=1}^n (Y_i^2 - 2Y_i\theta + \theta^2) + v_0(\theta^2 - 2\theta\mu_0 + \mu_0^2) \right) \right] d\theta \\ &\propto \int_{\theta} \exp \left[ -\frac{1}{2} \left( c_1 \left( \theta^2 - 2c_1^{-1}\theta \left( v \sum_{i=1}^n Y_i + v_0\mu_0 \right) \right) + v_0\mu_0^2 \right) \right] d\theta \\ &= \int_{\theta} \exp \left[ -\frac{1}{2} \left( c_1 \left( \theta - c_1^{-1} \left( v \sum_{i=1}^n Y_i + v_0\mu_0 \right) \right)^2 - c_1^{-1} \left( v \sum_{i=1}^n Y_i + v_0\mu_0 \right)^2 + v_0\mu_0^2 \right) \right] d\theta \\ &= \exp \left[ -\frac{1}{2} \left( -c_1^{-1} \left( v \sum_{i=1}^n Y_i + v_0\mu_0 \right)^2 + v_0\mu_0^2 \right) \right] \\ &\propto \exp \left[ -\frac{1}{2} \left( -c_1^{-1} \left( 2v_0\mu_0v \sum_{i=1}^n Y_i + v_0^2\mu_0^2 \right) + v_0\mu_0^2 \right) \right]. \end{aligned}$$

Now we chain all equalities and have

$$\begin{aligned} f(\mu_0) \exp \left[ -\frac{1}{2}\hat{v}(\mu_0 - \hat{\mu})^2 \right] &\propto \exp \left[ -\frac{1}{2} \left( -c_1^{-1} \left( 2v_0\mu_0v \sum_{i=1}^n Y_i + v_0^2\mu_0^2 \right) + v_0\mu_0^2 + \hat{v}(\mu_0^2 - 2\mu_0\hat{\mu} + \hat{\mu}^2) \right) \right] \\ &\propto \exp \left[ -\frac{1}{2}c_2 \left( \mu_0^2 - 2c_2^{-1}\mu_0 \left( c_1^{-1}v_0v \sum_{i=1}^n Y_i + \hat{v}\hat{\mu} \right) \right) \right] \\ &\propto \exp \left[ -\frac{1}{2}c_2 \left( \mu_0 - c_2^{-1} \left( c_1^{-1}v_0v \sum_{i=1}^n Y_i + \hat{v}\hat{\mu} \right) \right)^2 \right]. \end{aligned}$$

Finally, note that

$$c_1 = \frac{1}{\sigma_0^2} + \frac{n}{\sigma^2} = \frac{n\sigma_0^2 + \sigma^2}{\sigma_0^2\sigma^2},$$

$$c_1^{-1}v_0v = \frac{\sigma_0^2\sigma^2}{n\sigma_0^2 + \sigma^2} \frac{1}{\sigma_0^2\sigma^2} = \frac{1}{n\sigma_0^2 + \sigma^2},$$

$$c_2 = \frac{1}{\hat{\sigma}^2} + \frac{1}{\sigma_0^2} \left(1 - \frac{c_1^{-1}}{\sigma_0^2}\right) = \frac{1}{\hat{\sigma}^2} + \frac{1}{\sigma_0^2} \left(1 - \frac{\sigma^2}{n\sigma_0^2 + \sigma^2}\right) = \frac{1}{\hat{\sigma}^2} + \left(\sigma_0^2 + \frac{\sigma^2}{n}\right)^{-1} = \lambda.$$

This concludes the proof.  $\square$

**Lemma 8.** For any integer  $n$  and  $a \geq 0$ ,

$$\sum_{i=1}^n \frac{1}{\sqrt{i+a}} \leq 2(\sqrt{n+a} - \sqrt{a}) \leq 2\sqrt{n}.$$

*Proof.* Since  $1/\sqrt{i+a}$  decreases in  $i$ , the sum can be bounded using integration as

$$\sum_{i=1}^n \frac{1}{\sqrt{i+a}} \leq \int_{x=a}^{n+a} \frac{1}{\sqrt{x}} dx = 2(\sqrt{n+a} - \sqrt{a}).$$

The inequality  $\sqrt{n+a} - \sqrt{a} \leq \sqrt{n}$  holds because the square root has diminishing returns.  $\square$

**Lemma 9.** For any integer  $n$  and  $a \geq 0$ ,

$$\sum_{i=1}^n \frac{1}{i+a} \leq \log(1+n/a).$$

*Proof.* Since  $1/(i+a)$  decreases in  $i$ , the sum can be bounded using integration as

$$\sum_{i=1}^n \frac{1}{i+a} \leq \int_{x=a}^{n+a} \frac{1}{x} dx = \log(n+a) - \log a = \log(1+n/a).$$

$\square$

**Lemma 10.** For any integer  $n$  and  $a \geq 0$ ,

$$\sum_{i=1}^n \frac{1}{i+a} \leq \log(1+n/a).$$

## F REGRET BOUND EVALUATION

To evaluate the quality of our regret bound, we experiment with the Gaussian bandit in Section 6.4. The means and variances of rewards are sampled i.i.d. from a prior distribution parameterized by  $\mu_{0,i} = i/(K+1)$ ,  $\kappa_{0,i} = \gamma K$ ,  $\alpha_{0,i} = 4$ , and  $\beta_{0,i} = 1$ ; where  $\gamma > 0$  controls how informative the prior is. In particular, as  $\gamma \rightarrow \infty$ , the regret bound in Theorem 2 approaches zero and so should the regret of VarTS. As in Section 6.4, higher prior means indicate higher  $\mu_i$  and the average reward variance is 0.25. We experiment with  $K \in \{10, 20, 50\}$ .

We plot four trends: (a) Bayes regret of VarTS. (b) Leading term of the Bayes regret upper bound in Theorem 2, which approaches zero as  $\gamma \rightarrow \infty$ . (c) Leading term in frequentist gap-dependent regret bounds,  $\sum_{i:\mu_i < \mu_{a^*}} \frac{8\sigma^2}{\Delta_i} \log n$ , averaged over the instances  $\mu$  sampled from the prior. (d) Leading term in frequentist gap-free regret bounds,  $\sqrt{8\sigma^2 K n \log n}$ . We set  $\sigma^2 = 0.25$ , which is the average reward variance of arms sampled from our prior.

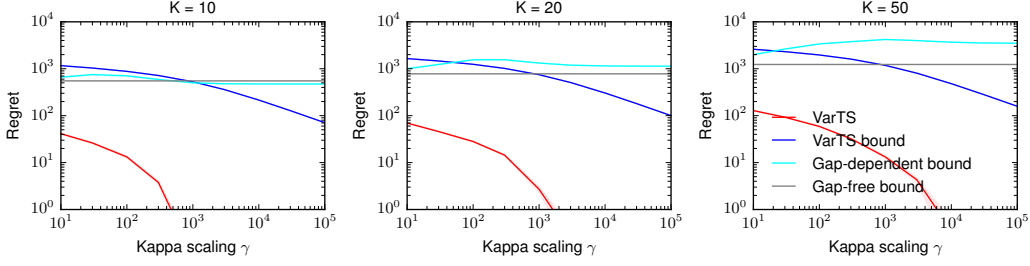

Figure 3: Regret of VarTS compared to its regret bound, and existing gap-dependent and gap-free regret bounds.

Our results are reported in Figure 3. We observe three trends. First, the regret of VarTS decreases as the prior becomes more informative,  $\gamma \rightarrow \infty$ . Second, the regret bound of VarTS decreases as  $\gamma \rightarrow \infty$ . Finally, as  $\gamma \rightarrow \infty$ , our regret bound becomes tighter than the frequentist gap-dependent and gap-free regret bounds. This is because it depends on how informative the prior is. In contrast,  $\sqrt{8\sigma^2 K n \log n}$  and the expectation of  $\sum_{i: \mu_i < \mu_{a^*}} \frac{8\sigma^2}{\Delta_i} \log n$  do not depend on it. This demonstrates the benefit of a proper Bayesian analysis over merely integrating a frequentist regret bound.
